# Supplementary material for: Physical and verbal abuse amid COVID-19: a nationwide cross-sectional survey in Japan
Source: PubMed Central journal article supplement — BMJ Open. 2022 Feb 16;12(2):e054915. doi: 10.1136/bmjopen-2021-054915 (PMC8889444; doi:10.1136/bmjopen-2021-054915), 2022-02-16
Supplement: bmjopen-2021-054915.draft_revisions.pdf [file bmjopen-2021-054915.draft_revisions.pdf]

# BMJ Open

BMJ Open is committed to open peer review. As part of this commitment we make the peer review history of every article we publish publicly available.

When an article is published we post the peer reviewers' comments and the authors' responses online. We also post the versions of the paper that were used during peer review. These are the versions that the peer review comments apply to.

The versions of the paper that follow are the versions that were submitted during the peer review process. They are not the versions of record or the final published versions. They should not be cited or distributed as the published version of this manuscript.

BMJ Open is an open access journal and the full, final, typeset and author-corrected version of record of the manuscript is available on our site with no access controls, subscription charges or pay-per-view fees (<http://bmjopen.bmj.com>).

If you have any questions on BMJ Open's open peer review process please email [info.bmjopen@bmj.com](mailto:info.bmjopen@bmj.com)

# BMJ Open

## Physical and verbal abuse amid COVID-19: a nationwide cross-sectional survey in Japan

|                               |                                                                                                                                                                                                                                                                                                                                                                                                                                                                                                                                           |
|-------------------------------|-------------------------------------------------------------------------------------------------------------------------------------------------------------------------------------------------------------------------------------------------------------------------------------------------------------------------------------------------------------------------------------------------------------------------------------------------------------------------------------------------------------------------------------------|
| Journal:                      | <i>BMJ Open</i>                                                                                                                                                                                                                                                                                                                                                                                                                                                                                                                           |
| Manuscript ID                 | bmjopen-2021-054915                                                                                                                                                                                                                                                                                                                                                                                                                                                                                                                       |
| Article Type:                 | Original research                                                                                                                                                                                                                                                                                                                                                                                                                                                                                                                         |
| Date Submitted by the Author: | 28-Jun-2021                                                                                                                                                                                                                                                                                                                                                                                                                                                                                                                               |
| Complete List of Authors:     | Bhandari, Divya; Medical Governance Research Institute<br>Ozaki, Akihiko; Minamisoma Municipal General Hospital, Department of Breast Surgery<br>Suzuki, Tomoya; Medical Governance Research Institute; Akita University<br>Shrestha, Sunil; Monash University Malaysia<br>Kotera, Yasuhiro; University of Derby<br>Horiuchi, Sayaka; University of Yamanashi<br>Takashi, Miyachi; Medical Governance Research Institute; Akita University<br>Tabuchi, Takahiro; Osaka Furitsu Seijinbyo Center, Center for Cancer Control and Statistics |
| Keywords:                     | PUBLIC HEALTH, EPIDEMIOLOGY, HEALTH SERVICES ADMINISTRATION & MANAGEMENT                                                                                                                                                                                                                                                                                                                                                                                                                                                                  |
|                               |                                                                                                                                                                                                                                                                                                                                                                                                                                                                                                                                           |

SCHOLARONE™  
Manuscripts

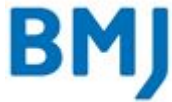

I, the Submitting Author has the right to grant and does grant on behalf of all authors of the Work (as defined in the below author licence), an exclusive licence and/or a non-exclusive licence for contributions from authors who are: i) UK Crown employees; ii) where BMJ has agreed a CC-BY licence shall apply, and/or iii) in accordance with the terms applicable for US Federal Government officers or employees acting as part of their official duties; on a worldwide, perpetual, irrevocable, royalty-free basis to BMJ Publishing Group Ltd ("BMJ") its licensees and where the relevant Journal is co-owned by BMJ to the co-owners of the Journal, to publish the Work in this journal and any other BMJ products and to exploit all rights, as set out in our [licence](#).

The Submitting Author accepts and understands that any supply made under these terms is made by BMJ to the Submitting Author unless you are acting as an employee on behalf of your employer or a postgraduate student of an affiliated institution which is paying any applicable article publishing charge ("APC") for Open Access articles. Where the Submitting Author wishes to make the Work available on an Open Access basis (and intends to pay the relevant APC), the terms of reuse of such Open Access shall be governed by a Creative Commons licence – details of these licences and which [Creative Commons](#) licence will apply to this Work are set out in our licence referred to above.

Other than as permitted in any relevant BMJ Author's Self Archiving Policies, I confirm this Work has not been accepted for publication elsewhere, is not being considered for publication elsewhere and does not duplicate material already published. I confirm all authors consent to publication of this Work and authorise the granting of this licence.

1  
2 **1 Physical and verbal abuse amid COVID-19: a nationwide cross-sectional survey in Japan**  
3

4  
5 2 Divya Bhandari,<sup>1</sup> Akihiko Ozaki,<sup>1,2</sup> Tomoya Suzuki,<sup>1,3</sup> Sunil Shrestha,<sup>4</sup> Yasuhiro Kotera,<sup>5</sup>  
6

7 3 Sayaka Horiuchi,<sup>6</sup> Miyachi Takashi,<sup>1,3</sup> Takahiro Tabuchi<sup>7</sup>  
8  
9

10  
11 4  
12  
13 5 1. Medical Governance Research Institute, Tokyo, Japan  
14

15  
16 6 2. Department of Breast Surgery, Jyoban Hospital of Tokiwa Foundation, Iwaki, Fukushima,  
17  
18 Japan  
19

20  
21 7  
22 8 3. Faculty of Medicine, Akita University, Akita, Japan  
23

24  
25 9 4. School of Pharmacy, Monash University Malaysia, Jalan Lagoon Selatan, 47500 Bandar  
26  
27 Sunway, Selangor, Malaysia  
28

29  
30 10  
31 11 5. Centre for Human Sciences Research, University of Derby, Derby, UK.  
32

33  
34 12 6. Center for Birth Cohort Studies, University of Yamanashi, Yamanashi, Japan  
35

36  
37 13 7. Cancer Control Center, Osaka International Cancer Institute, Osaka, Japan  
38

39  
40 14  
41

42  
43 15  
44

45  
46 16 \*Corresponding author  
47

48  
49 17 Divya Bhandari  
50

51 18 Researcher, Medical Governance Research Institute, Tokyo, Japan  
52

53 19 E-mail: rayordeal3@gmail.com ; Contact: 070-4454-0319  
54

55 20 Postal address: 108-0074, 2-12-13 Takanawa Residence Takanawa 201 Minato-ku, Tokyo, Japan  
56

57 21  
58

## 22 **Abstract**

### 23 **Objectives**

24 The detrimental impacts of abuse on victims' well-being are well documented globally,  
25 including Japan. The ongoing COVID-19 pandemic may increase the incidence of abuse in the  
26 community, creating an additional burden amid the crisis. However, the incidence of abuse in  
27 Japan during COVID-19 remains to be evaluated. Accordingly, our study aimed to assess the  
28 incidence of physical and verbal abuse among the general population in Japan and to identify the  
29 associated factors of abuse during COVID-19.

### 30 **Design and setting**

31 We used the data obtained from a nationwide, cross-sectional internet survey conducted in Japan  
32 between August and September 2020. Sampling weights were used to calculate national  
33 estimates, and multivariable logistic regression was performed to identify the associated factors  
34 for physical and verbal abuse.

### 35 **Results**

36 Out of the total 25,482 participants, 965 (3.8 %) reported experiencing physical abuse and 1941  
37 (7.6%) verbal abuse from April 2020 to September 2020. The incidence of physical and verbal  
38 abuse was higher among female participants. As key findings of our study, participants with  
39 COVID-19 symptoms, whose income was significantly reduced due to pandemic, those with  
40 already strained relationships, widows, divorcees, and those who did not regularly follow  
41 preventive behaviors such as wearing masks in public places were more likely to experience  
42 physical and verbal abuse.

## 46 **Conclusion**

47 The impact of abuse was found disproportionately greater in more vulnerable groups of the  
48 population. Pandemic has reinforced the existing social inequalities, which need to be addressed  
49 timely to prevent precarious repercussions.

51 **Keywords:** physical abuse, verbal abuse, Japan, pandemic, social inequality, vulnerable  
52 population

54 **Word count:** 3295

## 56 **Strength and Limitation of the study**

- 57 • This is the first nationwide cross-sectional study conducted to explore the incidence of abuse  
58 amid COVID-19 during the restriction period.
- 59 • Prevalance of the physical and verbal abuse and its associated factors were identified in this  
60 study.
- 61 • The findings of this study could be highly valuable for designing effective interventions to  
62 mitigate this problem amid crises.
- 63 • Participants who participated in the internet-based survey might differ from the general  
64 population. However, we used an inverse probability weighting (IPW) approach throughout the  
65 analyses to adjust the difference of response between the current internet survey and nationwide  
66 representative survey.

## 67 Introduction

68 Abuse is a serious public health problem that fundamentally violates human rights. Globally, one  
69 in three women and one in five men have been subjected to different forms of violence.<sup>1,2</sup> In the  
70 United States alone, 20 people per minute are physically abused by their partner, equating to  
71 more than 10 million women and men in one year.<sup>3,4</sup>

72  
73 Although the incidence of abuse is highly prevalent among women, it is not limited to particular  
74 gender only. All people, regardless of their races, cultures, or sexual orientations are exposed to  
75 abuse and have to deal with it in their lifetime.<sup>5</sup> Exposure to any kind of abuse is stressful  
76 whether it be physical abuse (infliction of physical pain by hitting, punching, strangling,  
77 restraining, pushing, or slapping), verbal abuse (demonstrating mental anguish by shouting and  
78 yelling), sexual or emotional abuse.

79  
80 With the advent of COVID-19, the incidence of abuse has become more apparent than ever  
81 before.<sup>6</sup> Travel restrictions and stay-at-home orders adopted to curb the spread of the virus have  
82 a profound impact on society leading to social, financial, and psychological repercussions.<sup>7</sup>

83 Stay-at-home orders have exacerbated the vulnerabilities of individuals whose lives are already  
84 afflicted by domestic violence.<sup>8</sup> Furthermore, business closures have significantly increased the  
85 unemployment rate and economic strain; all this has negatively impacted the mental health of the  
86 general population.<sup>9,10</sup> Financial hardships, increased threats to physical health coupled with their  
87 daily responsibilities have made people more violent and aggressive. While hotlines have been  
88 receiving complaints of domestic violence,<sup>11</sup> multiple instances of abuse were also seen outside  
89 the closed room among general people. Some instances include abusing health workers for

1  
2 90 spreading COVID-19,<sup>12</sup> abusing people for not wearing masks,<sup>13,14</sup> for not being able to pay  
3  
4 91 room rents,<sup>15</sup> etc.  
5  
6 92  
7  
8  
9 93 The consequences of such abuse are deleterious and can result in long-term damage to victims'  
10  
11 94 physical and mental well-being.<sup>16,17</sup> While physical abuse has direct effects on the physical body,  
12  
13 95 verbal abuse affects victims' thoughts and emotions. The immediate effects of physical abuse  
14  
15 96 include bruises, cuts, fractures, loss of teeth/hair, miscarriage, etc.<sup>18</sup> Verbal abuse does not  
16  
17 97 manifest visible effects immediately; however, it directly affects the victims' self-esteem.  
18  
19  
20 98 Prolonged exposure to abuse can lead to various mental health problems, including depression,  
21  
22 99 anxiety, and posttraumatic stress disorder (PTSD).<sup>19,20</sup> Victims are 1.7 to 4.6 times more likely to  
23  
24 100 develop an anxiety disorder, PTSD, or eating disorders.<sup>21,22</sup> Similarly, the effects on physical  
25  
26 101 health include the higher age-adjusted mortality rates and various chronic health problems such  
27  
28 102 as asthma, epilepsy, migraines, hypertension, etc.<sup>23-25</sup>. Under current stressful living conditions,  
29  
30 103 the additional burden of abuse could take a heavy toll on people.  
31  
32  
33  
34 104  
35  
36 105 In Japan, spousal, elderly, and child abuse have been noted from time to time. In 2019, more than  
37  
38 106 80,000 cases of domestic violence consultations were reported.<sup>26</sup> Similarly, the prevalence of  
39  
40 107 elder abuse was found to be 12.3%, with 2.6% experiencing physical abuse and 11.6%  
41  
42 108 experiencing verbal abuse.<sup>27</sup> Furthermore, as mentioned above, COVID-19 has created a  
43  
44 109 situation of widespread uncertainty and panic which might stimulate abuse in the community.  
45  
46 110 Apparently, as mentioned on various news portals, multiple cases of abuse were reported among  
47  
48 111 the general population in Japan.<sup>28,29</sup> However, detailed study on this issue has not been done yet.  
49  
50  
51 112 Taken together, our study aimed to i) identify the incidence of physical and verbal abuse among  
52  
53  
54  
55  
56  
57  
58  
59  
60



1  
2 113 the general population of Japan amid COVID-19 and ii) investigate factors associated with such  
3  
4 114 abuses.

5  
6 115

## 10 116 **Methods**

### 13 117 **Settings and Participants**

17 118 We used the data from Japan COVID-19 and Society Internet Survey study` (JACSIS) collected  
18  
19 119 by a large internet research agency Rakuten Insight, Inc., which had approximately 2.2 million  
20  
21 120 qualified panelists. It was a cross-sectional, web-based, self-reported questionnaire survey, which  
22  
23 121 was distributed to 224,389 participants selected through simple random sampling. The online  
24  
25 122 questionnaires were distributed from August 25, 2020, and were completed on September 30,  
26  
27 123 2020, after reaching a total target sample size of 28,000 participants from all 47 prefectures.  
28  
29

30  
31 124

### 34 125 **Ethical approval**

38 126 The ethical approval was received from the Research Ethics Committee of the Osaka  
39  
40 127 International Cancer Institute (Approval No. 20084). Web-based informed consent was obtained  
41  
42 128 from the participants before providing access to the main questionnaire. Participants had an  
43  
44 129 option to discontinue at any time during the survey. Participants involved in the study were  
45  
46 130 provided with “e-points”, credit points that can be used for internet shopping.  
47  
48  
49  
50  
51  
52  
53  
54  
55  
56  
57  
58  
59  
60

1  
2  
3 131  
4  
5

## 6 132 **Patient and public involvement**

7  
8  
9 133 There were no patients involved in this study

## 10 11 12 134 **Outcome variable and assessment**

13  
14  
15 135 **Physical and verbal abuse:** Participants were asked whether they encountered any form of  
16  
17 136 physical or verbal abuse from April 2020 (from emergency declaration due to COVID-19) to the  
18  
19 137 data collection period. They were asked whether they were physically assaulted by anyone such  
20  
21 138 as being punched, kicked, thrown, or locked in the room. Similarly, they were asked if they were  
22  
23 139 verbally abused or ignored for a long time, or encountered any self-esteem damaging behaviors  
24  
25 140 from others. Responses were measured in the binary outcome, “Yes” and “No” each.  
26  
27  
28

29 141  
30  
31

## 32 142 **Exposure variables and assessment**

33  
34  
35 143 **Socio-demographic characteristics:** The demographics included age (categorized as: below 20,  
36  
37 144 20-40, 40-60 and above 60), gender, education levels (Junior High School, High School,  
38  
39 145 College, University/Graduate school, and others), marital status (with spouse, unmarried,  
40  
41 146 widow/widower, divorced), number of people living together (only one, 2-5 members, more than  
42  
43 147 5), change in income after pandemic (categorized as a decrease by more than 50%, decrease by  
44  
45 148 less than 50%, constant, increase by 50% and increase by 100%), types of job (public servant,  
46  
47 149 agriculture, working in the industry, business, medical care, education, and other services), work  
48  
49 150 from home since March or April (yes, no), and relationship with a spouse (Better, constant,  
50  
51 151 worse, do not know, not applicable).  
52  
53  
54  
55

56 152  
57  
58  
59  
60

1  
2 153 **Personal health status:** Participants were asked about their perceived health status, presence of  
3  
4 154 walking impairment, and presence of any COVID-19-related symptoms. Perceived health status  
5  
6 155 was asked in the five-item Likert scale from “good” to “not good”. Similarly, COVID-19  
7  
8 156 symptoms were asked such as high fever, fatigue, sore throat, cough, nausea, smell disorder, etc.  
9  
10 157 which were considered to have high sensitivity and specificity.<sup>30</sup> Responses were measured as  
11  
12 158 binary options “Yes” and “No”. Rather than treating each variable separately, they were treated  
13  
14 159 as a continuous variable (more symptoms of COVID-19, more severe the problem).  
15  
16  
17  
18  
19

20 161 **Prefecture-wise COVID-19 infection and Emergency declaration:** The number of COVID-19  
21  
22 162 cases by prefecture was calculated from January 15, 2020, to September 30, 2020. They were  
23  
24 163 divided by the population per prefecture based on the estimate on October 1, 2019. During  
25  
26 164 analyses, the number of COVID-19 cases/prefecture was divided into three categories using  
27  
28 165 quartile (lowest, medium, and highest).  
29  
30  
31 166 For the emergency declaration variable, three categories were created; category 1 included  
32  
33 167 prefectures where the state of emergency was enforced, category 2 included the prefecture with  
34  
35 168 specific alerts and category 3 included the remaining prefecture.  
36  
37  
38  
39  
40

41 170 **Personal Behaviors:** Personal behaviors were also included such as substance abuse, frequency  
42  
43 171 of alcohol intake, and use of masks in the public areas. The frequency of alcohol intake was  
44  
45 172 asked as less than 1 cup, more than 1 less than 2 cups, more than 2 but less than 3, and more than  
46  
47 173 3. These were treated as a continuous variable during analysis and the same for substance abuse.  
48  
49 174 Responses for use of mask while visiting public places were categorized as always, sometimes,  
50  
51 175 and never/rarely.  
52  
53  
54

55 176  
56  
57  
58  
59  
60

1  
2 1773  
4  
5 178 **Data analysis**

6  
7  
8 179 Out of 28,000 responses collected, 25,482 were included in the analysis after removing  
9  
10 180 discrepancies and unnatural responses. Three criteria were used to detect such discrepancies; i)  
11  
12 181 those who selected "yes" to all asked diseases listed ii) those who ticked wrong response to the  
13  
14 182 verification question "Please choose the second from the bottom", iii) those who selected all  
15  
16 183 options for drug use behaviors, who were then removed from the analysis.

17  
18  
19 184 First, we compared the socio-demographic characteristics and all other exposure variables among  
20  
21 185 participants experiencing physical abuse and those who did not. The same procedure was applied  
22  
23 186 for verbal abuse as well. As participants who participated in the internet-based survey might  
24  
25 187 differ from the general population, we used an inverse probability weighting (IPW) approach  
26  
27 188 throughout the analyses to adjust the difference of response between the current internet survey  
28  
29 189 and nationwide representative survey. Propensity scores were calculated by logistic regression  
30  
31 190 analysis using sex, age, and socioeconomic factors to adjust for differences between a current  
32  
33 191 and population-based sample from the Comprehensive Survey of Living Conditions of People on  
34  
35 192 Health and Welfare 2016. Detailed methods (e.g. participation rate and data management) are  
36  
37 193 presented in the previous study.<sup>31</sup>

38  
39  
40 194 Second, we performed simple and multivariable logistic regression to identify the factors  
41  
42 195 associated with physical and verbal abuse. For each outcome, we constructed two regression  
43  
44 196 models to control for potential confounders. Simple logistic regression was conducted to identify  
45  
46 197 the significant factors followed by multivariable logistic regression for adjusting confounders  
47  
48 198 and covariates. Weighted multivariable logistic regression models, with standard error (SEs)  
49  
50 199 clustered at the prefecture level, were used to account for the potential correlation of respondents  
51  
52  
53  
54  
55  
56  
57

1  
2 200 within the same prefecture. A separate analysis was conducted for both physical and verbal  
3  
4 201 abuse. Statistical significance was set at 0.05.  
5  
6  
7

## 8 202 **Results**

9

10  
11 203 Table 1 shows the characteristics of participants experiencing physical and verbal abuse.

12  
13 204 Analyses were weighted to adjust the difference between participants in this internet survey and  
14  
15 205 national representative samples. The unweighted characteristics of participants experiencing  
16  
17 206 physical and verbal abuse is presented in the supplementary information.

18  
19  
20 207 Of the total, 965 (3.8%) participants mentioned experiencing physical abuse, and 1941 (7.6%)  
21  
22 208 encountering verbal abuse. Both physical abuse and verbal abuse were most common among the  
23  
24 209 age group 20-40 years with 70.6% and 46.6% respectively. The incidence of physical abuse was  
25  
26 210 higher among females with 73.3% and verbal abuse higher among male participants with 55.5%.  
27  
28  
29 211 Among participants experiencing physical abuse, 176 (18.2%) experienced income loss of more  
30  
31 212 than 50% during a pandemic, only 121 (12.5%) mentioned having “good” health status, 356  
32  
33 213 (36.9%) were working from home and 91 (9.5%) started having the worst relationship with their  
34  
35 214 spouse during a pandemic. Similarly, among participants experiencing verbal abuse, 197 (10.2%)  
36  
37 215 experienced income loss of more than 50% during the pandemic, only 152 (7.8%) mentioned  
38  
39 216 having “good” health status, 71,143 (58.9%) were working from home, and 394 (20.3%) started  
40  
41 217 having the worst relationship with their spouse during a pandemic.  
42  
43  
44  
45  
46  
47  
48  
49  
50  
51  
52  
53  
54  
55  
56  
57  
58  
59  
60

**Table 1: Characteristics of participants experiencing physical and verbal abuse (N= 25,482)**

| Variables                  | Total<br>n | Weightage incidence of<br>physical abuse |        |       |        | P<br>value | Weightage incidence of<br>verbal abuse |        |       |        | P<br>value |
|----------------------------|------------|------------------------------------------|--------|-------|--------|------------|----------------------------------------|--------|-------|--------|------------|
|                            |            | Yes                                      |        | No    |        |            | Yes                                    |        | No    |        |            |
|                            |            | n                                        | %      | n     | %      |            | n                                      | (%)    | n     | (%)    |            |
|                            |            | 965                                      | (3.8)  | 24517 | (96.2) |            | 1941                                   | (7.6)  | 23541 | (92.4) |            |
| <b>Age</b>                 |            |                                          |        |       |        | <0.001     |                                        |        |       |        | <0.001     |
| Below 20                   | 1214       | 82                                       | (8.5)  | 1132  | (4.6)  |            | 118                                    | (6.1)  | 1096  | (4.7)  |            |
| 20-40                      | 6978       | 681                                      | (70.6) | 6297  | (25.7) |            | 905                                    | (46.6) | 6074  | (25.8) |            |
| 40-60                      | 9150       | 142                                      | (14.7) | 9008  | (36.7) |            | 558                                    | (28.8) | 8592  | (36.5) |            |
| Above 60                   | 8140       | 60                                       | (6.2)  | 8080  | (33.0) |            | 360                                    | (18.6) | 7780  | (33.0) |            |
| <b>Sex</b>                 |            |                                          |        |       |        | <0.001     |                                        |        |       |        | 0.256      |
| Female                     | 12673      | 708                                      | (73.3) | 11965 | (48.8) |            | 1,078                                  | (55.5) | 11595 | (49.3) |            |
| Male                       | 12809      | 257                                      | (26.7) | 12552 | (51.2) |            | 863                                    | (44.5) | 11946 | (50.7) |            |
| <b>Education Level</b>     |            |                                          |        |       |        | <0.001     |                                        |        |       |        | 0.459      |
| Junior High School         | 1732       | 74                                       | (7.6)  | 1658  | (6.8)  |            | 108                                    | (5.6)  | 1624  | (6.9)  |            |
| High School                | 9640       | 256                                      | (26.5) | 9385  | (38.3) |            | 454                                    | (23.4) | 9186  | (39.0) |            |
| College                    | 4928       | 101                                      | (10.5) | 4827  | (19.7) |            | 329                                    | (17.0) | 4599  | (19.5) |            |
| University/Graduate school | 8975       | 512                                      | (53.1) | 8462  | (34.5) |            | 1,048                                  | (54.0) | 7927  | (33.7) |            |
| Others                     | 207        | 22                                       | (2.3)  | 185   | (0.8)  |            | 2                                      | (0.1)  | 205   | (0.9)  |            |
| <b>Marital Status</b>      |            |                                          |        |       |        | <0.001     |                                        |        |       |        | <0.001     |
| With spouse                | 16100      | 257                                      | (26.6) | 15844 | (64.6) |            | 895                                    | (46.1) | 15205 | (64.6) |            |
| Unmarried                  | 6046       | 192                                      | (19.8) | 5854  | (23.9) |            | 452                                    | (23.3) | 5594  | (23.8) |            |
| Widow/Widower              | 1949       | 504                                      | (52.2) | 1446  | (5.9)  |            | 521                                    | (26.8) | 1428  | (6.1)  |            |
| Divorced                   | 1387       | 13                                       | (1.4)  | 1373  | (5.6)  |            | 73                                     | (3.8)  | 1314  | (5.6)  |            |
| <b>Change in income</b>    |            |                                          |        |       |        | <0.001     |                                        |        |       |        | <0.001     |
| Decrease by more than 50%  | 1886       | 176                                      | (18.2) | 1710  | (7.0)  |            | 197                                    | (10.2) | 1689  | (7.2)  |            |
| Decrease by less than 50%  | 4482       | 99                                       | (10.2) | 4384  | (17.9) |            | 314                                    | (16.2) | 4168  | (17.7) |            |
| Constant                   | 10594      | 133                                      | (13.8) | 10460 | (42.7) |            | 484                                    | (25.0) | 10109 | (42.9) |            |

|                                                  |       |     |        |       |        |        |        |       |        |
|--------------------------------------------------|-------|-----|--------|-------|--------|--------|--------|-------|--------|
| Increase by 50%                                  | 798   | 18  | (1.8)  | 781   | (3.2)  | 164    | (8.5)  | 634   | (2.7)  |
| Increase by 100%                                 | 7722  | 539 | (55.9) | 7183  | (29.3) | 781    | (40.2) | 6942  | (29.5) |
| <b>Number of people living together</b>          |       |     |        |       |        | 0.001  |        |       | 0.131  |
| Only one                                         | 4117  | 300 | (31)   | 3817  | (15.6) | 174    | (9.0)  | 3943  | (16.7) |
| 2-5 members                                      | 20537 | 622 | (64.5) | 19915 | (81.2) | 1,697  | (87.4) | 18840 | (80.0) |
| More than 5                                      | 828   | 43  | (4.5)  | 785   | (3.2)  | 70     | (3.6)  | 758   | (3.2)  |
| <b>Prefecture by level of Covid-19 infection</b> |       |     |        |       |        | 0.447  |        |       | 0.423  |
| High                                             | 3541  | 428 | (44.3) | 3113  | (12.7) | 148    | (7.6)  | 3393  | (14.4) |
| Moderate                                         | 8885  | 266 | (27.6) | 8619  | (35.2) | 880    | (45.3) | 8005  | (34.0) |
| Low                                              | 13056 | 271 | (28.1) | 12785 | (52.1) | 913    | (47.1) | 12143 | (51.6) |
| <b>Emergency declaration</b>                     |       |     |        |       |        | 0.577  |        |       | 0.179  |
| Emergency declared prefecture                    | 7251  | 601 | (62.3) | 6650  | (27.1) | 671    | (34.6) | 6580  | (28)   |
| Specific alert prefectures                       | 3790  | 59  | (6.1)  | 3731  | (15.2) | 158    | (8.1)  | 3632  | (15.4) |
| No specific restriction                          | 14441 | 305 | (31.6) | 14137 | (57.7) | 1,112  | (57.3) | 13329 | (56.6) |
| <b>Perceived Health status</b>                   |       |     |        |       |        | <0.001 |        |       | <0.001 |
| Good                                             | 4889  | 121 | (12.5) | 4769  | (19.4) | 152    | (7.8)  | 4738  | (20.1) |
| Tolerable                                        | 5360  | 211 | (21.9) | 5149  | (21.0) | 558    | (28.8) | 4802  | (20.4) |
| Usual                                            | 11787 | 424 | (44.0) | 11363 | (46.3) | 521    | (26.9) | 11266 | (47.9) |
| Not so good                                      | 2717  | 192 | (19.9) | 2525  | (10.3) | 277    | (14.3) | 2440  | (10.4) |
| Not good                                         | 729   | 17  | (1.7)  | 712   | (2.9)  | 433    | (22.3) | 296   | (1.3)  |
| <b>Work from home</b>                            |       |     |        |       |        | 0.017  |        |       | 0.002  |
| No                                               | 12653 | 609 | (63.1) | 12044 | (49.1) | 798    | (41.1) | 11855 | (50.4) |
| Yes                                              | 12829 | 356 | (36.9) | 12473 | (50.9) | 1,143  | (58.9) | 11686 | (49.6) |
| <b>Type of work</b>                              |       |     |        |       |        | 0.596  |        |       | 0.118  |
| Public servant                                   | 973   | 143 | (17.8) | 830   | (5.7)  | 41     | (3.2)  | 932   | (6.6)  |
| Agriculture                                      | 217   | 11  | (1.4)  | 206   | (1.4)  | 19     | (1.5)  | 198   | (1.4)  |
| Industry                                         | 5111  | 210 | (26.2) | 4901  | (33.4) | 380    | (30.3) | 4731  | (33.3) |
| Business                                         | 2719  | 53  | (6.6)  | 2666  | (18.2) | 160    | (12.8) | 2559  | (18)   |
| Food and Beverage                                | 492   | 9   | (1.2)  | 483   | (3.3)  | 54     | (4.3)  | 438   | (3.1)  |
| Medical                                          | 1166  | 53  | (6.6)  | 1113  | (7.6)  | 66     | (5.2)  | 1100  | (7.7)  |
| Welfare                                          | 677   | 18  | (2.3)  | 658   | (4.5)  | 44     | (3.5)  | 633   | (4.5)  |

|                                                           |           |            |        |           |        |           |        |           |        |
|-----------------------------------------------------------|-----------|------------|--------|-----------|--------|-----------|--------|-----------|--------|
| Education                                                 | 919       | 10         | (1.2)  | 909       | (6.2)  | 160       | (12.7) | 759       | (5.3)  |
| Other (not classified elsewhere)                          | 3182      | 293        | (36.6) | 2889      | (19.7) | 332       | (26.5) | 2849      | (20.1) |
| <b>Relationship with spouse</b>                           |           |            |        |           |        |           |        |           |        |
| Better                                                    | 935       | 26         | (2.7)  | 909       | (3.7)  | 303       | (15.6) | 632       | (2.7)  |
| constant                                                  | 13656     | 379        | (39.3) | 13277     | (54.2) | 659       | (34.0) | 12996     | (55.2) |
| Worse                                                     | 1221      | 91         | (9.5)  | 1129      | (4.6)  | 394       | (20.3) | 827       | (3.5)  |
| Do not know                                               | 553       | 10         | (1.1)  | 542       | (2.2)  | 14        | (0.7)  | 539       | (2.3)  |
| Not applicable                                            | 9119      | 459        | (47.5) | 8660      | (35.3) | 571       | (29.4) | 8548      | (36.3) |
| <b>Use of mask while visiting public places</b>           |           |            |        |           |        |           |        |           |        |
| Always                                                    | 21244     | 327        | (33.9) | 20917     | (85.3) | 1,578     | (81.3) | 19666     | (83.5) |
| Sometime                                                  | 2774      | 327        | (33.9) | 2448      | (10.0) | 300       | (15.5) | 2474      | (10.5) |
| Never/Rarely                                              | 1464      | 312        | (32.3) | 1152      | (4.7)  | 63        | (3.2)  | 1401      | (6.0)  |
| <b>Walking impairment</b>                                 |           |            |        |           |        |           |        |           |        |
| No                                                        | 21939     | 367        | (1.7)  | 21572     | (98.3) | 1,062     | (54.7) | 20877     | (88.7) |
| Yes                                                       | 3543      | 598        | (16.9) | 2945      | (83.1) | 879       | (45.3) | 2664      | (11.3) |
| Practice of substance abuse [Mean (Sd)]                   | 7.0 (2.5) | 11.4 (4.1) |        | 6.9 (2.2) | <0.001 | 8.9 (3.5) |        | 6.9 (2.3) | <0.001 |
| Frequency of alcohol intake [Mean (Sd)]                   | 1.1 (1.3) | 0.8 (1.3)  |        | 1.1 (1.3) | 0.211  | 0.9 (1.3) |        | 1.1 (1.3) | 0.223  |
| Presence of symptoms associated with COVID-19 [Mean (Sd)] | 0.9 (1.5) | 2.4 (2.8)  |        | 0.8 (1.4) | <0.001 | 2.2 (2.1) |        | 0.8 (1.4) | <0.001 |

Analyses were weighted to adjust the difference between participants in this internet survey and national representative samples. The analyses of this table were for the purpose of simple description only and did not account for multiple comparisons in the presentation of the p values. Description of all variables are presented in n and % except for continuous data which are presented in mean and standard deviation.

Abbreviations: AOR= adjusted odds ratio; CI = confidence interval, Sd = standard deviation



1  
2 218 Table 2 demonstrates the result of multivariable logistic regression analysis of the associated  
3  
4 219 factors for physical and verbal abuse. Participants aged 40 and above were less likely to  
5  
6 220 experience physical abuse compared to participants in their 20s (Adjusted Odds Ratio [AOR] =  
7  
8 221 0.28; 95% Confidence Interval [CI] = 0.13 - 0.57). While widow/widowers were 8.72 times odd  
9  
10 222 of experiencing physical abuse (AOR = 8.72, 95% CI = 2.69 - 28.21), unmarried and divorced  
11  
12 223 participants were 3.77 times odd of experiencing verbal abuse (AOR = 3.77, 95% CI = 1.41 -  
13  
14 224 10.06) compared to married participants. Moreover, participants whose income was decreased by  
15  
16 225 more than 50% were 3.25 times odd of experiencing physical abuse (AOR = 3.25, 95% CI = 1.64  
17  
18 226 -6.44). Similarly, participants who had symptoms related to COVID-19 were more likely to  
19  
20 227 experience physical (AOR = 1.23, 95% CI = 1.10 - 1.36) and verbal abuse (AOR = 1.22, 95% CI  
21  
22 = 1.14 - 1.28). Participants who were not wearing masks regularly in public places were more  
23  
24 228 likely to experience both physical (AOR = 2.88, 95% CI = 1.76 - 4.70) and verbal abuse (AOR =  
25  
26 229 1.76, 95% CI = 1.41 - 2.20).  
27  
28  
29  
30  
31  
32  
33  
34  
35  
36  
37  
38  
39  
40  
41  
42  
43  
44  
45  
46  
47  
48  
49  
50  
51  
52  
53  
54  
55  
56  
57  
58  
59  
60

240 **Table 2: Factors associated with the physical and verbal abuse (N= 25,482)**

| Variables                                       | Physical Abuse |                |         | Verbal abuse |                |         |
|-------------------------------------------------|----------------|----------------|---------|--------------|----------------|---------|
|                                                 | AOR            | (95% CI)       | P-value | AOR          | (95% CI)       | P-value |
| <b>Age</b>                                      |                |                |         |              |                |         |
| Below 20                                        | 1.00           | (Reference)    |         | 1.00         | (Reference)    |         |
| 20-40                                           | 0.55           | (0.26 - 1.12)  | 0.103   | 0.66         | (0.33 - 1.30)  | 0.232   |
| 40-60                                           | 0.28           | (0.13 - 0.57)  | 0.001   | 0.68         | (0.35 - 1.30)  | 0.242   |
| Above 60                                        | 0.10           | (0.003 - 0.25) | <0.001  | 0.37         | (0.15 - 0.87)  | 0.023   |
| <b>Marital Status</b>                           |                |                |         |              |                |         |
| With spouse                                     | 1.00           | (Reference)    |         | 1.00         | (Reference)    |         |
| Unmarried                                       | 1.56           | (0.75 - 3.23)  | 0.234   | 5.20         | (2.02 - 13.3)  | 0.001   |
| Widow/Widower                                   | 8.72           | (2.69 - 28.21) | <0.001  | 3.39         | (0.80 - 14.38) | 0.097   |
| Divorced                                        | 0.96           | (0.42 - 2.17)  | 0.92    | 3.77         | (1.41 - 10.06) | 0.008   |
| <b>Change in income</b>                         |                |                |         |              |                |         |
| Decrease by more than 50%                       | 3.25           | (1.64 - 6.44)  | 0.001   | 1.09         | (0.63 - 1.89)  | 0.732   |
| Decrease by less than 50%                       | 1.68           | (0.86 - 3.26)  | 0.123   | 0.86         | (0.60 - 1.23)  | 0.426   |
| Constant                                        | 1.00           | (Reference)    |         | 1.00         | (Reference)    |         |
| Increase by 50%                                 | 0.04           | (0.00 - 0.58)  | 0.017   | 1.14         | (0.65 - 1.98)  | 0.632   |
| Increase by 100%                                | 2.03           | (1.03 - 4.00)  | 0.039   | 1.04         | (0.77 - 1.40)  | 0.794   |
| <b>Perceived Health status</b>                  |                |                |         |              |                |         |
| Good                                            | 1.00           | (Reference)    |         | 1.00         | (Reference)    |         |
| Tolerable                                       | 0.94           | (0.33 - 2.63)  | 0.911   | 2.27         | (1.38 - 3.71)  | 0.001   |
| Usual                                           | 0.94           | (0.35 - 2.47)  | 0.901   | 1.17         | (0.78 - 1.74)  | 0.450   |
| Not so good                                     | 1.19           | (0.39 - 3.60)  | 0.754   | 2.20         | (1.55 - 3.12)  | <0.001  |
| Not good                                        | 0.03           | (0.00 - 0.25)  | 0.001   | 12.41        | (5.46 - 28.16) | <0.001  |
| <b>Relationship with spouse</b>                 |                |                |         |              |                |         |
| Better                                          | 0.56           | (0.13 - 2.26)  | 0.416   | 2.01         | (1.38 - 2.92)  | <0.001  |
| Constant                                        | 1.00           | (Reference)    |         | 1.00         | (Reference)    |         |
| Worse                                           | 3.56           | (2.18 - 5.81)  | <0.001  | 5.07         | (3.56 - 7.23)  | <0.001  |
| Do not know                                     | 0.75           | (0.26 - 2.15)  | 0.596   | 0.52         | (0.26 - 1.05)  | 0.069   |
| Not applicable                                  | 0.44           | (0.20 - 0.96)  | 0.039   | 0.33         | (0.12 - 0.89)  | 0.030   |
| <b>Use of mask while visiting public places</b> |                |                |         |              |                |         |
| Always                                          | 1.00           | (Reference)    |         | 1.00         | (Reference)    |         |
| Sometime                                        | 2.24           | (1.41 - 3.54)  | 0.001   | 1.68         | (1.44 - 1.95)  | <0.001  |
| Never/Rarely                                    | 2.88           | (1.76 - 4.70)  | <0.001  | 1.76         | (1.41 - 2.20)  | <0.001  |
| <b>Walking impairment</b>                       |                |                |         |              |                |         |
| No                                              | 1.00           | (Reference)    |         | 1.00         | (Reference)    |         |
| Yes                                             | 3.43           | (2.22 - 5.30)  | <0.001  | 1.88         | (1.34 - 2.63)  | <0.001  |
| <b>Practice of substance abuse</b>              |                |                |         |              |                |         |
| Presence of symptoms associated with COVID-19   | 1.13           | (1.07 - 1.18)  | <0.001  | 1.12         | (1.07 - 1.15)  | <0.001  |

241

242

1  
2  
3  
4  
5  
6  
7  
8  
9  
10  
11  
12  
13  
14  
15  
16  
17  
18  
19  
20  
21  
22  
23  
24  
25  
26  
27  
28  
29  
30  
31  
32  
33  
34  
35  
36  
37  
38  
39  
40  
41  
42  
43  
44  
45  
46  
47  
48  
49  
50  
51  
52  
53  
54  
55  
56  
57  
58  
59  
60

243 Abbreviations: AOR= adjusted odds ratio; CI: confidence interval.

244 For each outcome, we constructed a weighted multivariable logistic regression model with SEs clustered at the

245 prefecture-level. Variables associated in the bivariate logistic regression were included in the multiple logistic

246 regression. The above model was adjusted for sex, education, no of people living together and work from home

For peer review only

## 247 Discussion

248 The incidence of physical abuse and verbal abuse among the general population in Japan amid  
249 COVID-19 was found to be 3.8% and 7.6%, respectively. The incidence of physical and verbal  
250 abuse was higher among female participants. While widows/widowers were more likely to  
251 experience physical violence, divorcees were more likely to experience verbal violence. Younger  
252 participants and participants who had been abusing drugs were more likely to encounter both  
253 physical and verbal abuse. Similarly, participants who had symptoms related to COVID-19, who  
254 were not wearing masks regularly, whose income was reduced due to pandemic, and who did not  
255 have a good relationship with their spouse were more likely to experience both physical and  
256 verbal abuse.

257  
258 The incidence of abuse reported in our study should be interpreted cautiously. Our study was a  
259 web-based study that might have limited the accessibility of the survey to actual victims.

260 Decreased access to the internet and connections with services were hypothesized to be the  
261 reason for under-reporting in some cases.<sup>32</sup> However, there could be a chance of over-reporting  
262 as well due to the nature of the self-reported survey. Nonetheless, data on the prevalence of  
263 abuse among similar populations over similar time periods are not available, making it difficult  
264 to quantify the changes in the incidence of the abuse.

265  
266 The percentage of women experiencing physical and verbal abuse was higher in our study.

267 Previous studies have also underscored the higher incidence of abuse faced by female  
268 participants globally.<sup>33,34</sup> A longitudinal study conducted among 161 countries found that  
269 approximately one in three women have been subjected to different forms of intimate  
270 partner/non-partner or both abuse.<sup>35</sup> Women were found to experience higher rates of repeated

1  
2 271 abuse than males; and in most cases, males are found to be the perpetrator of the abuse.<sup>36</sup>  
3  
4 272 Moreover, crises and times of unrest have been linked to an increased rate of abuse among  
5  
6 273 female participants.<sup>37</sup> However, from our study findings, we cannot claim women were more  
7  
8 274 likely to experience abuse than men as sex was not associated in the multivariable analysis. Our  
9  
10 275 study measured the incidence of abuse faced by people in the community (not only domestic  
11  
12 276 abuse), unlike other studies which mainly focused on domestic abuse and violence. In addition, it  
13  
14 277 has been found that both women and men are equally likely to initiate abuse and violence  
15  
16 278 although men tend to become more aggressive and opt for physical abuse.<sup>38</sup> Evidently, in our  
17  
18 279 study percentage of males experiencing verbal abuse was slightly lower than female participants  
19  
20 280 with 44.5%. However, the incidence of physical abuse was distinctively higher among females  
21  
22 281 with 73.3%.  
23  
24  
25  
26  
27  
28

29 283 As expected, participants who did not have a good relationship with their spouses were more  
30  
31 284 likely to experience abuse in our study. Restrictions and stay-at-home orders forced the  
32  
33 285 individual to spend time with their spouse and family members most of the time, which turned  
34  
35 286 out to be a catastrophic milieu for individuals whose relationships were already strained.  
36  
37 287 Numerous studies have highlighted the incidence of domestic violence amid COVID-19. For  
38  
39 288 example, in China, the incidence of domestic violence tripled compared to the previous year;<sup>39</sup>  
40  
41 289 similarly, a 36% increase in complaints of domestic abuse were reported in France;<sup>40</sup> in the UK,  
42  
43 290 there was a 25% increase in calls related to domestic violence.<sup>41</sup> Furthermore, many countries  
44  
45 291 reported an increase in homicide as a result of domestic violence.<sup>41</sup> It seems plausible that  
46  
47 292 strained relationships are more likely to cause conflict especially in times of crisis; however,  
48  
49 293 when comparing participants by marital status, our study findings highlighted that  
50  
51 294 widows/widowers and divorcees were more likely to experience abuse compared to married  
52  
53  
54  
55  
56  
57  
58  
59  
60

1  
2 295 ones. Our findings align with the previous study which mentioned that incidence of physical,  
3  
4 296 sexual, and emotional violence is common among those separated and whose partner has died  
5  
6 297 compared to married ones.<sup>42</sup> The condition of widows/widowers and divorcees, particularly  
7  
8 298 women remains deplorable in society and often victimized because they are considered weak  
9  
10  
11 299 with low social support.<sup>42</sup>  
12

13 300  
14  
15 301 Along with the sociodemographic characteristics, COVID-19-related consequences were more  
16  
17 302 likely to add the burden of abuse. Although we did not find a significant direct association  
18  
19 303 between the state of emergency declaration and the incidence of abuse, other factors associated  
20  
21 304 with the pandemic (e.g., change in income during the pandemic, COVID-19 symptoms, use of  
22  
23 305 masks, etc.) were significantly associated. Unlike many other countries, Japan did not enforce a  
24  
25 306 complete lockdown, and the government did not mandate a strong restriction to all areas.<sup>43</sup>  
26  
27 307 Many organizations and sectors operated in an almost normal manner. In such cases, the  
28  
29 308 emergency declaration itself only might not have a significant impact on the overall change in  
30  
31 309 the incidence of abuse.  
32  
33  
34  
35

36 310  
37  
38 311 Moreover, economic repercussions due to COVID-19 were undeniable; the sudden and possibly  
39  
40 312 long-term increase in unemployment has precipitate or exacerbates potential stressors. In our  
41  
42 313 study, participants whose income was reduced drastically due to the pandemic were more likely  
43  
44 314 to experience abuse. Findings align with the previous study where children born in families with  
45  
46 315 low socioeconomic status were 14 times more likely to experience maltreatment than those in  
47  
48 316 higher quartiles.<sup>44</sup> Furthermore, if a victim have adequate resources, they are more likely to  
49  
50 317 escape from their abusers. For instance, if the spouse is the abuser, they can leave the  
51  
52 318 relationship; if their landlord is the abuser, then they can move/settle elsewhere. Particularly  
53  
54  
55  
56  
57

1  
2 319 during COVID-19, instances of abuse were noted for not being able to pay room rent and tuition  
3  
4 320 fees,<sup>10</sup> which needs to be addressed diligently.  
5

6 321  
7  
8  
9 322 Similarly, participants who were not using masks regularly were more likely to experience  
10  
11 323 abuse. This was also evident from the information presented in various news portals where  
12  
13 324 people were abused for not using masks in public places.<sup>13,14,29</sup> It is undeniable that people  
14  
15 325 should be conscious about their health and mindful of their actions and that all individuals must  
16  
17 326 make an effort to reduce transmission. However, in any case, abuse is not acceptable: one better  
18  
19 327 approach may be educating another person and trying to be more empathetic in this crisis rather  
20  
21 328 than directly attacking others without knowing the reason.  
22  
23  
24

25 329  
26  
27 330 Moreover, participants who had been using drugs were more likely to experience physical and  
28  
29 331 verbal abuse. This finding can be interpreted in different ways. Due to the cross-sectional nature  
30  
31 332 of the study design, findings might have been driven by reverse causality. Indeed, those who  
32  
33 333 experienced abuse might have developed a habit of taking drugs. Another interpretation could be  
34  
35 334 that participants who mentioned being abused might have actually perpetrated violence under the  
36  
37 335 influence of the substance due to a loss of self-control. Nonetheless, the finding of our study is  
38  
39 336 not sufficient to claim this notion. Currently, along with the emergency declaration, the Japanese  
40  
41 337 government is singling out alcohol consumption in bars and restaurants to reduce the possibility  
42  
43 338 of transmission<sup>45</sup>. This rule was imposed considering the aftermath of having alcohol such as  
44  
45 339 talking loudly on trains, lingering in public places, and resultantly being involved in arguments.  
46  
47  
48  
49

50 340  
51  
52 341 The findings of our study should be interpreted in light of the following limitations. First, data  
53  
54 342 were collected from an internet survey which might have limited the responses of a certain group  
55  
56  
57

1  
2 343 of population. However, as described in the method section, this was adjusted to approximate the  
3  
4 344 national representative sample. Second, due to the cross-sectional design of our study, some  
5  
6 345 findings might have been driven by reverse causality. Lastly, since it was a self-reported survey,  
7  
8 346 there might have been under or over-reporting of the incidence. However, information about  
9  
10 347 confidentiality was explicitly mentioned. Despite these limitations, this is the first nationwide  
11  
12 348 cross-sectional study conducted to explore the incidence of abuse amid COVID-19 during the  
13  
14 349 restriction period. The findings of this study could be highly valuable for designing effective  
15  
16 350 interventions to mitigate this problem amid crises.  
17  
18  
19  
20  
21

## 22 351 **Conclusion**

23  
24 352 The incidence of verbal abuse was comparatively higher than physical abuse among the general  
25  
26 353 population in Japan amid COVID-19. While physical abuse was highest among female  
27  
28 354 participants, the incident of verbal abuse was almost similar among males and females. People  
29  
30 355 who had the symptoms related to COVID-19 and who were not wearing masks regularly in  
31  
32 356 public places were more likely to encounter both verbal and physical abuse. Furthermore,  
33  
34 357 vulnerable people whose income was drastically reduced, whose relationship was already  
35  
36 358 strained, who were widows, and divorcees were more likely to experience abuse. The findings of  
37  
38 359 this study have reinforced important truths of existing inequalities among the general population  
39  
40 360 which tend to be magnified during crises. Crises like COVID-19 do not inflict equivalent  
41  
42 361 hardships to all people, rather exacerbate or spark diverse forms of abuse to vulnerable groups of  
43  
44 362 population. Therefore, it is highly imperative to focus on those individuals and provide timely  
45  
46 363 support.  
47  
48  
49  
50  
51  
52  
53  
54  
55  
56  
57  
58  
59  
60



## 364 **Author Contribution**

365 DB conceptualized, analyzed the data, wrote the first draft, and revised the manuscript. AO, TS,  
366 SS, YK, SH, MT, and TT reviewed and revised the manuscript. All authors read the final  
367 manuscript and approved it for submission.

## 368 **Funding**

369 This study was funded by the Japan Society for the Promotion of Science (JSPS) KAKENHI  
370 Grants [grant number 17H03589;19K10671;19K10446;18H03107; 18H03062], the JSPS Grant-  
371 in-Aid for Young Scientists [grant number 19K19439], Research support program to apply the  
372 wisdom of the university to tackle COVID-19 related emergency problems, University of  
373 Tsukuba, and Health Labor Sciences Research Grant [grant number 19FA1005;19FG2001]. The  
374 findings and conclusions of this article are the sole responsibility of the authors and do not  
375 represent the official views of the research funders.

## 376 **Conflict of Interest**

377 Dr. Akihiko Ozaki received personal fees from MNES Inc, outside the submitted work. All other  
378 authors have declared that no competing interests exist.

## 380 **References**

- 381 1. Futures without violence. The Facts on International Gender-based Violence [Internet].  
382 2010 [cited 2021 Apr 30]. Available from:  
383 <http://www.who.int/mediacentre/factsheets/fs239/en/>.<http://www.state.gov/documents/organization/143327.pdf>.  
384
- 385 2. World Health Organization. World Health Organization. Violence against women

- 1  
2 386 [Internet]. World Health Organization. 2021 [cited 2021 Apr 30]. Available from:  
3  
4 387 <https://www.who.int/news-room/fact-sheets/detail/violence-against-women>  
5  
6  
7 388 3. Smith SG, Fowler KA, Niolon PH. Intimate partner homicide and corollary victims in 16  
8  
9 389 states: National violent death reporting system, 2003-2009. *Am J Public Health*. 2014  
10  
11 390 Mar;104(3):461–6.  
12  
13  
14  
15 391 4. National Coalition Against Domestic Violence. Domestic violence. 2020 [cited 2021 Apr  
16  
17 392 30]; Available from: [https://assets.speakcdn.com/assets/2497/domestic\\_violence-](https://assets.speakcdn.com/assets/2497/domestic_violence-2020080709350855.pdf?1596811079991)  
18  
19 393 [2020080709350855.pdf?1596811079991](https://assets.speakcdn.com/assets/2497/domestic_violence-2020080709350855.pdf?1596811079991).  
20  
21  
22 394 5. World Health Organization. Global and regional estimates of violence against women:  
23  
24 395 prevalence and health effects of intimate partner violence and non-partner sexual violence  
25  
26  
27 396 [Internet]. 2013 [cited 2021 Apr 30]. Available from: [www.who.int](http://www.who.int)  
28  
29  
30 397 6. Sharma A, Borah SB. Covid-19 and Domestic Violence: an Indirect Path to Social and  
31  
32 398 Economic Crisis. *J Fam Violence* [Internet]. 2020 Jul 28 [cited 2021 May 5];1–7.  
33  
34 399 Available from: <https://doi.org/10.1007/s10896-020-00188-8>  
35  
36  
37 400 7. Robillard R, Saad M, Edwards J, Solomonova E, Pennestri MH, Daros A, et al. Social,  
38  
39 401 financial and psychological stress during an emerging pandemic: Observations from a  
40  
41 402 population survey in the acute phase of COVID-19. *BMJ Open* [Internet]. 2020 Dec 12  
42  
43 403 [cited 2021 Apr 30];10(12):43805. Available from: <http://bmjopen.bmj.com/>  
44  
45  
46  
47 404 8. Bradbury-Jones C, Isham L. The pandemic paradox: The consequences of COVID-19 on  
48  
49 405 domestic violence. *J Clin Nurs* [Internet]. 2020 Jul 22 [cited 2021 Apr 30];29(13–  
50  
51 406 14):2047–9. Available from: <https://onlinelibrary.wiley.com/doi/abs/10.1111/jocn.15296>  
52  
53  
54  
55 407 9. Zhai Y, Du X. Addressing collegiate mental health amid COVID-19 pandemic. Vol. 288,  
56  
57

- 1  
2 408 Psychiatry Research. Elsevier Ireland Ltd; 2020. p. 113003.  
3  
4
- 5 409 10. Bhandari D, Kotera Y, Ozaki A, Abeysinghe S, Kosaka M, Tanimoto T. COVID-19:  
6  
7 410 challenges faced by Nepalese migrants living in Japan. BMC Public Health [Internet].  
8  
9 411 2021 Dec 19 [cited 2021 Apr 30];21(1):752. Available from:  
10  
11  
12 412 <http://www.ncbi.nlm.nih.gov/pubmed/33874937>  
13  
14
- 15 413 11. UN Women. Violence against women and girls: the shadow pandemic | UN Women –  
16  
17 414 Headquarters [Internet]. 2020 [cited 2021 Apr 30]. Available from:  
18  
19 415 [https://www.unwomen.org/en/news/stories/2020/4/statement-ed-phumzile-violence-against-women-during-pandemic?gclid=Cj0KQCQjw1a6EBhC0ARIsAOiTkrFnWaKUuGav8BOQ0Lz9\\_NAVMhVn1oLl1bu9OIUOyGMrhDMw9Uuk2AYaAktDEALw\\_wcB](https://www.unwomen.org/en/news/stories/2020/4/statement-ed-phumzile-violence-against-women-during-pandemic?gclid=Cj0KQCQjw1a6EBhC0ARIsAOiTkrFnWaKUuGav8BOQ0Lz9_NAVMhVn1oLl1bu9OIUOyGMrhDMw9Uuk2AYaAktDEALw_wcB)  
20  
21  
22 416  
23  
24 417  
25  
26 418  
27  
28
- 29 419 12. McKay D, Heisler M, Mishori R, Catton H, Kloiber O. Attacks against health-care  
30  
31 420 personnel must stop, especially as the world fights COVID-19 [Internet]. Vol. 395, The  
32  
33 421 Lancet. Lancet Publishing Group; 2020 [cited 2021 Apr 30]. p. 1743–5. Available from:  
34  
35 422 <https://www.rivm.nl/en/novel->  
36  
37  
38
- 39 423 13. Opinion. Mask rage: ‘One man told me I shouldn’t be allowed out if I can’t wear one’ |  
40  
41 424 Coronavirus | The Guardian. 2020 [cited 2021 Apr 30]; Available from:  
42  
43 425 <https://www.theguardian.com/world/2020/aug/01/mask-face-coverings-i-cant-wear-one-health-reasons>  
44  
45 426  
46  
47  
48
- 49 427 14. Avon and Somerset Police. Woman abused in Tesco for not wearing face mask - police  
50  
51 428 issue CCTV appeal | West Country | ITV News. 2021 [cited 2021 Apr 30]; Available  
52  
53 429 from: <https://www.itv.com/news/westcountry/2021-04-06/woman-abused-in-tesco-for-not-wearing-face-mask-police-issue-cctv-appeal>  
54  
55 430  
56  
57

- 1  
2 431 15. Ali SS. Some landlords are using harassment, threats to force out tenants during COVID-  
3  
4 432 19 crisis. 2020 Jun 14 [cited 2021 Apr 30]; Available from:  
5  
6 433 [https://www.nbcnews.com/news/us-news/some-landlords-are-using-harassment-threats-  
8 force-out-tenants-during-n1218216](https://www.nbcnews.com/news/us-news/some-landlords-are-using-harassment-threats-<br/>7 force-out-tenants-during-n1218216)  
9 434
- 10  
11 435 16. Alejo K. Long-Term Physical and Mental Health Effects of Domestic Violence [Internet].  
12  
13 Vol. 2, Themis: Research Journal of Justice Studies and Forensic Science. 2014 [cited  
14 436 2021 Apr 30]. Available from:  
15  
16 437 <http://scholarworks.sjsu.edu/themis> Available at: [http://scholarworks.sjsu.edu/themis/vol2/is  
18 s1/5](http://scholarworks.sjsu.edu/themis/vol2/is<br/>17 s1/5)  
19 438  
20  
21 439
- 22  
23 440 17. Kisely S, Strathearn L, Najman JM. Child maltreatment and mental health problems in 30-  
24  
25 year-old adults: A birth cohort study. *J Psychiatr Res*. 2020 Oct 1;129:111–7.  
26 441  
27  
28 442 18. Dhar D, McDougal L, Hay K, Atmavilas Y, Silverman J, Triplett D, et al. Associations  
29  
30 between intimate partner violence and reproductive and maternal health outcomes in  
31 443 Bihar, India: A cross-sectional study. *Reprod Health* [Internet]. 2018 Jun 19 [cited 2021  
32 444 Apr 30];15(1):1–14. Available from: [https://link.springer.com/articles/10.1186/s12978-  
34 018-0551-2](https://link.springer.com/articles/10.1186/s12978-<br/>33 018-0551-2)  
35 445  
36 446
- 37  
38 447 19. Blasco-Ros C, Sánchez-Lorente S, Martínez M. Recovery from depressive symptoms,  
39  
40 state anxiety and post-traumatic stress disorder in women exposed to physical and  
41 448 psychological, but not to psychological intimate partner violence alone: A longitudinal  
42  
43 study. *BMC Psychiatry* [Internet]. 2010 Nov 25 [cited 2021 Apr 30];10(1):98. Available  
44 449 from: <http://bmcp psychiatry.biomedcentral.com/articles/10.1186/1471-244X-10-98>  
45  
46 450  
47  
48 451  
49  
50 452 20. Lee H, Kim Y, Terry J. Adverse childhood experiences (ACEs) on mental disorders in  
51  
52 young adulthood: Latent classes and community violence exposure. *Prev Med (Baltim)*.  
53  
54 453

- 1  
2 454 2020 May 1;134:106039.  
3  
4  
5 455 21. Golding JM. Intimate partner violence as a risk factor for mental disorders: A meta-  
6  
7 456 analysis. *J Fam Violence* [Internet]. 1999 Jun [cited 2021 Apr 30];14(2):99–132.  
8  
9 457 Available from: <https://link.springer.com/article/10.1023/A:1022079418229>  
10  
11  
12 458 22. Danielson KK, Moffitt TE, Caspi A, Silva PA. Comorbidity between abuse of an adult  
13  
14 459 and DSM-III-R mental disorders: Evidence from an epidemiological study. *Am J*  
15  
16 460 *Psychiatry* [Internet]. 1998 [cited 2021 Apr 30];155(1):131–3. Available from:  
17  
18 461 <https://pubmed.ncbi.nlm.nih.gov/9433353/>  
19  
20  
21  
22 462 23. Chen E, Turiano NA, Mroczek DK, Miller GE. Association of reports of childhood abuse  
23  
24 463 and all-cause mortality rates in women. *JAMA Psychiatry* [Internet]. 2016 Sep 1 [cited  
25  
26 464 2021 Apr 30];73(9):920–7. Available from: </pmc/articles/PMC5234580/>  
27  
28  
29  
30 465 24. Cripe SM, Sanchez SE, Gelaye B, Sanchez E, Williams MA. Association between  
31  
32 466 intimate partner violence, migraine and probable migraine. *Headache* [Internet]. 2011 Feb  
33  
34 467 [cited 2021 Apr 30];51(2):208–19. Available from: </pmc/articles/PMC3662491/>  
35  
36  
37  
38 468 25. World Health Organization. Health consequences [Internet]. 2012 [cited 2021 Apr 30].  
39  
40 469 Available from:  
41  
42 470 [https://apps.who.int/iris/bitstream/handle/10665/77431/WHO\\_RHR\\_12.43\\_eng.pdf;jsessi](https://apps.who.int/iris/bitstream/handle/10665/77431/WHO_RHR_12.43_eng.pdf;jsessionid=6D01B3188171E7ED4A503DFBCCBF2E1D?sequence=1)  
43  
44 471 [onid=6D01B3188171E7ED4A503DFBCCBF2E1D?sequence=1](https://apps.who.int/iris/bitstream/handle/10665/77431/WHO_RHR_12.43_eng.pdf;jsessionid=6D01B3188171E7ED4A503DFBCCBF2E1D?sequence=1)  
45  
46  
47  
48 472 26. Honda S, Ogawa R. Domestic Violence in Japan. An Invisible Problem in the “Safest  
49  
50 473 Country in the World” [Internet]. 2021 [cited 2021 May 7]. Available from:  
51  
52 474 <https://www.associazionelucacoscioni.it/notizie/comunicati/violenza-domestica-cresce->  
53  
54 475 [durante-](https://www.associazionelucacoscioni.it/notizie/comunicati/violenza-domestica-cresce-)  
55  
56  
57  
58  
59  
60

- 1  
2 476 27. Koga C, Hanazato M, Tsuji T, Suzuki N, Kondo K. Behavioural Science Section /  
3  
4 477 Original Paper Elder Abuse and Social Capital in Older Adults: The Japan Gerontological  
5  
6 478 Evaluation Study. *Gerontology* [Internet]. 2013 [cited 2021 May 7];66:149–59. Available  
7  
8  
9 479 from: [www.karger.com/ger](http://www.karger.com/ger)
- 10  
11  
12 480 28. McGee O. Angry confrontation breaks out after man coughs on Yamanote Line train in  
13  
14 481 Tokyo - Japan Today. *National* [Internet]. 2020 Mar 2 [cited 2021 Apr 30]; Available  
15  
16 482 from: [https://japantoday.com/category/national/angry-confrontation-breaks-out-after-man-](https://japantoday.com/category/national/angry-confrontation-breaks-out-after-man-coughs-on-yamanote-line-train-in-tokyo)  
17  
18 483 [coughs-on-yamanote-line-train-in-tokyo](https://japantoday.com/category/national/angry-confrontation-breaks-out-after-man-coughs-on-yamanote-line-train-in-tokyo)
- 19  
20  
21  
22 484 29. Japan Today. Man on train pushes emergency button after passenger without mask coughs  
23  
24 485 - Japan Today [Internet]. *National*. 2020 [cited 2021 Apr 30]. Available from:  
25  
26 486 [https://japantoday.com/category/national/Man-on-train-pushes-emergency-button-after-](https://japantoday.com/category/national/Man-on-train-pushes-emergency-button-after-passenger-without-mask-coughs)  
27  
28 487 [passenger-without-mask-coughs](https://japantoday.com/category/national/Man-on-train-pushes-emergency-button-after-passenger-without-mask-coughs)
- 29  
30  
31 488 30. Struyf T, Deeks JJ, Dinnes J, Takwoingi Y, Davenport C, Leeftang MMG, et al. Signs and  
32  
33 489 symptoms to determine if a patient presenting in primary care or hospital outpatient  
34  
35 490 settings has COVID-19 disease [Internet]. Vol. 2020, *Cochrane Database of Systematic*  
36  
37 491 *Reviews*. John Wiley and Sons Ltd; 2020 [cited 2021 May 2]. Available from:  
38  
39 492 <https://pubmed.ncbi.nlm.nih.gov/32633856/>
- 40  
41  
42  
43 493 31. Miyawaki A, Tabuchi T, Tomata Y, Tsugawa Y. Association between participation in the  
44  
45 494 government subsidy programme for domestic travel and symptoms indicative of COVID-  
46  
47 495 19 infection in Japan: cross-sectional study. *BMJ Open* [Internet]. 2021 Apr 1 [cited 2021  
48  
49 496 May 2];11(4):e049069. Available from: <http://dx.doi.org/10.1136/bmjopen-2021-049069>
- 50  
51  
52  
53 497 32. Evans ML, Lindauer M, Farrell ME. A Pandemic within a Pandemic — Intimate Partner  
54  
55 498 Violence during Covid-19. *N Engl J Med* [Internet]. 2020 Dec 10 [cited 2021 May

- 2] ;383(24):2302–4. Available from: <http://www.nejm.org/doi/10.1056/NEJMp2024046>
33. Yuan W, Hesketh T. Intimate partner violence against women and its association with depression in three regions of China: a cross-sectional study. *Lancet* [Internet]. 2019 Oct 1 [cited 2021 May 10];394:S5. Available from: [www.thelancet.com](http://www.thelancet.com)
34. Samarasekera U, Horton R. Prevention of violence against women and girls: A new chapter. Vol. 385, *The Lancet*. Lancet Publishing Group; 2015. p. 1480–2.
35. World Health Organization. Global, regional and national prevalence estimates for intimate partner violence against women and global and regional prevalence estimates for non-partner sexual violence against women. [Internet]. 2018 [cited 2021 May 10]. Available from: [https://cdn.who.int/media/docs/default-source/documents/violence-prevention/vaw\\_report\\_web\\_09032021\\_oleksandr.pdf?sfvrsn=a82ef89c\\_5&download=true](https://cdn.who.int/media/docs/default-source/documents/violence-prevention/vaw_report_web_09032021_oleksandr.pdf?sfvrsn=a82ef89c_5&download=true)
36. Jewkes R, Fulu E, Roselli T, Garcia-Moreno C. Prevalence of and factors associated with non-partner rape perpetration: Findings from the UN multi-country cross-sectional study on men and violence in Asia and the Pacific. *Lancet Glob Heal* [Internet]. 2013 Oct 1 [cited 2021 May 10];1(4):e208–18. Available from: [www.thelancet.com/lancetgh](http://www.thelancet.com/lancetgh)
37. Fraser E. Impact of COVID-19 Pandemic on Violence against Women and Girls [Internet]. 2020 [cited 2021 May 10]. Available from: <https://www.who.int/emergencies/diseases/novel-coronavirus->
38. Reid RJ, Bonomi AE, Rivara FP, Anderson ML, Fishman PA, Carrell DS, et al. Intimate Partner Violence Among Men. Prevalence, Chronicity, and Health Effects. *Am J Prev Med* [Internet]. 2008 Jun [cited 2021 May 10];34(6):478–85. Available from: <https://pubmed.ncbi.nlm.nih.gov/18471583/>

- 1  
2 522 39. Ebrahimian BA. China's coronavirus quarantines raise domestic violence fears - Axios.  
3  
4 523 AXIOS [Internet]. 2020 [cited 2021 May 2]; Available from:  
5  
6 524 [https://www.axios.com/china-domestic-violencecoronavirus-quarantine-7b00c3ba-35bc-](https://www.axios.com/china-domestic-violencecoronavirus-quarantine-7b00c3ba-35bc-4d16-afdd-b76ecfb28882.html)  
7  
8 525 [4d16-afdd-b76ecfb28882.html](https://www.axios.com/china-domestic-violencecoronavirus-quarantine-7b00c3ba-35bc-4d16-afdd-b76ecfb28882.html)  
9  
10  
11  
12 526 40. Reuters News Agency. As domestic abuse rises in lockdown, France to fund hotel rooms |  
13  
14 527 Coronavirus pandemic News | Al Jazeera. 2020 Mar [cited 2021 May 2]; Available from:  
15  
16 528 [https://www.aljazeera.com/news/2020/3/31/as-domestic-abuse-rises-in-lockdown-france-](https://www.aljazeera.com/news/2020/3/31/as-domestic-abuse-rises-in-lockdown-france-to-fund-hotel-rooms)  
17  
18 529 [to-fund-hotel-rooms](https://www.aljazeera.com/news/2020/3/31/as-domestic-abuse-rises-in-lockdown-france-to-fund-hotel-rooms)  
19  
20  
21  
22 530 41. Bradbury-Jones C, Isham L. The pandemic paradox: The consequences of COVID-19 on  
23  
24 531 domestic violence. *J Clin Nurs* [Internet]. 2020 Jul 22 [cited 2021 May 2];29(13–  
25  
26 532 14):2047–9. Available from: <https://onlinelibrary.wiley.com/doi/abs/10.1111/jocn.15296>  
27  
28  
29 533 42. National Demographic and Health Survey PSA. One In Four Women Have Ever  
30  
31 534 Experienced Spousal Violence. [Internet]. Philippine Statistics Authority. 2017 [cited  
32  
33 535 2021 May 2]. Available from: [https://psa.gov.ph/content/one-four-women-have-ever-](https://psa.gov.ph/content/one-four-women-have-ever-experienced-spousal-violence-preliminary-results-2017-national)  
34  
35 536 [experienced-spousal-violence-preliminary-results-2017-national](https://psa.gov.ph/content/one-four-women-have-ever-experienced-spousal-violence-preliminary-results-2017-national)  
36  
37  
38  
39 537 43. Yuko A. How will the state of emergency affect daily life? . NHK World\_Japan [Internet].  
40  
41 538 2020 [cited 2021 May 5]; Available from:  
42  
43 539 <https://www3.nhk.or.jp/nhkworld/en/news/backstories/1015/>  
44  
45  
46  
47 540 44. O'Donnell M, Nassar N, Leonard H, Jacoby P, Mathews R, Patterson Y, et al.  
48  
49 541 Characteristics of non-Aboriginal and Aboriginal children and families with substantiated  
50  
51 542 child maltreatment: a population-based study. *Int J Epidemiol* [Internet]. 2010 Jun 1 [cited  
52  
53 543 2021 May 2];39(3):921–8. Available from: [https://academic.oup.com/ije/article-](https://academic.oup.com/ije/article-lookup/doi/10.1093/ije/dyq005)  
54  
55 544 [lookup/doi/10.1093/ije/dyq005](https://academic.oup.com/ije/article-lookup/doi/10.1093/ije/dyq005)  
56  
57  
58  
59  
60



1  
2 545 45. Swift R. Japan's restaurant booze ban sets new COVID-19 emergency apart | Reuters.  
3  
4 546 Health care and Pharmaceuticals [Internet]. 2021 [cited 2021 May 2]; Available from:  
5  
6 547 <https://www.reuters.com/business/healthcare-pharmaceuticals/japans-restaurant-booze->  
7  
8 [ban-sets-new-covid-19-emergency-apart-2021-04-23/](https://www.reuters.com/business/healthcare-pharmaceuticals/japans-restaurant-booze-ban-sets-new-covid-19-emergency-apart-2021-04-23/)  
9  
10

11  
12 549  
13  
14  
15  
16  
17  
18  
19  
20  
21  
22  
23  
24  
25  
26  
27  
28  
29  
30  
31  
32  
33  
34  
35  
36  
37  
38  
39  
40  
41  
42  
43  
44  
45  
46  
47  
48  
49  
50  
51  
52  
53  
54  
55  
56  
57

For peer review only

### Supplementary table (Unweighted)

**Table 1: Characteristics of participants experiencing physical and verbal abuse (N= 25,482)**

| Variables                  | Total<br>n (%) | Physical Abuse |               | P<br>value  | Verbal Abuse |               | P<br>value |             |
|----------------------------|----------------|----------------|---------------|-------------|--------------|---------------|------------|-------------|
|                            |                | No             | n (%)         |             | Yes n (%)    | No            |            | n (%)       |
|                            |                | 24957 (97.9%)  |               | 525 (2.1%)  |              | 24043 (94.3%) |            | 1439 (5.6%) |
| <b>Age</b>                 |                |                |               |             | <0.001       |               |            | <0.001      |
| Below 20                   | 1,214 (4.8)    |                | 1144 (4.6%)   | 70 (13.3%)  |              | 1105 (4.6%)   |            | 109 (7.6%)  |
| 20-40                      | 6,978 (27.4)   |                | 6730 (27.0%)  | 248 (47.2%) |              | 6473 (26.9%)  |            | 505 (35.1%) |
| 40-60                      | 9,150 (35.9)   |                | 9001 (36.1%)  | 149 (28.4%) |              | 8562 (35.6%)  |            | 588 (40.9%) |
| Above 60                   | 8,140 (31.9)   |                | 8082 (32.4%)  | 58 (11.0%)  |              | 7903 (32.9%)  |            | 237 (16.5%) |
| <b>Sex</b>                 |                |                |               |             | <0.001       |               |            | 0.26        |
| Female                     | 12,673 (49.7)  |                | 12370 (49.6%) | 303 (57.7%) |              | 11978 (49.8%) |            | 695 (48.3%) |
| Male                       | 12,809 (50.3)  |                | 12587 (50.4%) | 222 (42.3%) |              | 12065 (50.2%) |            | 744 (51.7%) |
| <b>Education Level</b>     |                |                |               |             | <0.001       |               |            | 0.35        |
| Junior High School         | 410 (1.6)      |                | 393 (1.6%)    | 17 (3.2%)   |              | 379 (1.6%)    |            | 31 (2.2%)   |
| High School                | 7,201 (28.3)   |                | 7080 (28.4%)  | 121 (23.0%) |              | 6813 (28.3%)  |            | 388 (27.0%) |
| College                    | 5637 (22.1)    |                | 5533 (22.2%)  | 104 (19.8%) |              | 5305 (22.1%)  |            | 332 (23.1%) |
| University/Graduate school | 12172 (47.8)   |                | 11891 (47.6%) | 281 (53.5%) |              | 11487 (47.8%) |            | 685 (47.6%) |
| Others                     | 62 (0.2)       |                | 60 (0.2%)     | 2 (0.4%)    |              | 59 (0.2%)     |            | 3 (0.2%)    |
| <b>Marital Status</b>      |                |                |               |             | <0.001       |               |            | <0.001      |
| With spouse                | 15230 (59.8)   |                | 14980 (60.0%) | 250 (47.6%) |              | 14493 (60.3%) |            | 737 (51.2%) |
| Unmarried                  | 7806 (30.6)    |                | 7566 (30.3%)  | 240 (45.7%) |              | 7222 (30.0%)  |            | 584 (40.6%) |
| Widow/Widower              | 844 (3.3)      |                | 833 (3.3%)    | 11 (2.1%)   |              | 813 (3.4%)    |            | 31 (2.2%)   |
| Divorced                   | 1602 (6.3)     |                | 1578 (6.3%)   | 24 (4.6%)   |              | 1515 (6.3%)   |            | 87 (6.0%)   |
| <b>Change in income</b>    |                |                |               |             | <0.001       |               |            | <0.001      |
| Decrease by more than 50%  | 1684 (6.6)     |                | 1596 (6.4%)   | 88 (16.8%)  |              | 1500 (6.2%)   |            | 184 (12.8%) |
| Decrease by less than 50%  | 4705 (18.5)    |                | 4576 (18.3%)  | 129 (24.6%) |              | 4362 (18.1%)  |            | 343 (23.8%) |
| Constant                   | 11441 (44.9)   |                | 11325 (45.4%) | 116 (22.1%) |              | 10998 (45.7%) |            | 443 (30.8%) |

|                                                  |               |               |             |               |              |
|--------------------------------------------------|---------------|---------------|-------------|---------------|--------------|
| Increase by 50%                                  | 642 (2.5)     | 620 (2.5%)    | 22 (4.2%)   | 592 (2.5%)    | 50 (3.5%)    |
| Increase by 100%                                 | 7010 (27.5)   | 6840 (27.4%)  | 170 (32.4%) | 6591 (27.4%)  | 419 (29.1%)  |
| <b>Number of people living together</b>          |               |               |             | 0.001         | 0.083        |
| Only one                                         | 4997 (19.6)   | 4886 (19.6%)  | 111 (21.1%) | 4695 (19.5%)  | 302 (21.0%)  |
| 2-5 members                                      | 19856 (77.9)  | 19467 (78.0%) | 389 (74.1%) | 18764 (78.0%) | 1092 (75.9%) |
| More than 5                                      | 629 (2.5)     | 604 (2.4%)    | 25 (4.8%)   | 584 (2.4%)    | 45 (3.1%)    |
| <b>Prefecture by level of Covid-19 infection</b> |               |               |             | 0.72          | 0.47         |
| High                                             | 5125 (20.1)   | 5012 (20.1%)  | 113 (21.5%) | 4843 (20.1%)  | 282 (19.6%)  |
| Moderate                                         | 11546 (45.3)  | 11313 (45.3%) | 233 (44.4%) | 10908 (45.4%) | 638 (44.3%)  |
| Low                                              | 8811 (34.6)   | 8632 (34.6%)  | 179 (34.1%) | 8292 (34.5%)  | 519 (36.1%)  |
| <b>Emergency declaration</b>                     |               |               |             | 0.87          | 0.28         |
| Emergency declared prefecture                    | 11,586 (45.4) | 11344 (45.5%) | 242 (46.1%) | 10957 (45.6%) | 629 (43.7%)  |
| Specific alert prefectures                       | 4,339 (17.0)  | 4254 (17.0%)  | 85 (16.2%)  | 4096 (17.0%)  | 243 (16.9%)  |
| No specific restriction                          | 9,557 (37.5)  | 9359 (37.5%)  | 198 (37.7%) | 8990 (37.4%)  | 567 (39.4%)  |
| <b>Perceived Health status</b>                   |               |               |             | <0.001        | <0.001       |
| Good                                             | 4939 (19.4)   | 4844 (19.4%)  | 95 (18.1%)  | 4760 (19.8%)  | 179 (12.4%)  |
| Tolerable                                        | 8072 (31.7)   | 7937 (31.8%)  | 135 (25.7%) | 7721 (32.1%)  | 351 (24.4%)  |
| Usual                                            | 8910 (35.0)   | 8756 (35.1%)  | 154 (29.3%) | 8473 (35.2%)  | 437 (30.4%)  |
| Not so good                                      | 2913 (11.4)   | 2824 (11.3%)  | 89 (17.0%)  | 2562 (10.7%)  | 351 (24.4%)  |
| Not good                                         | 648 (2.5)     | 596 (2.4%)    | 52 (9.9%)   | 527 (2.2%)    | 121 (8.4%)   |
| <b>Work from home</b>                            |               |               |             | 0.016         | 0.002        |
| No                                               | 11637 (45.7)  | 11370 (45.6%) | 267 (50.9%) | 10923 (45.4%) | 714 (49.6%)  |
| Yes                                              | 13845 (54.3)  | 13587 (54.4%) | 258 (49.1%) | 13120 (54.6%) | 725 (50.4%)  |
| <b>Type of work</b>                              |               |               |             | 0.5           | 0.12         |
| Public servant                                   | 996 (6.4)     | 964 (6.4%)    | 32 (8.5%)   | 928 (6.4%)    | 68 (7.0%)    |
| Agriculture                                      | 152 (0.9)     | 144 (1.0%)    | 8 (2.1%)    | 139 (1.0%)    | 13 (1.3%)    |
| Industry                                         | 5102 (33.0)   | 4973 (33.0%)  | 129 (34.4%) | 4799 (33.1%)  | 303 (31.4%)  |
| Business                                         | 2920 (18.8)   | 2851 (18.9%)  | 69 (18.4%)  | 2733 (18.9%)  | 187 (19.4%)  |
| Food and Beverage                                | 480 (3.1)     | 467 (3.1%)    | 13 (3.5%)   | 438 (3.0%)    | 42 (4.3%)    |
| Medical                                          | 1132 (7.3)    | 1100 (7.3%)   | 32 (8.5%)   | 1053 (7.3%)   | 79 (8.2%)    |
| Welfare                                          | 673 (4.3)     | 658 (4.4%)    | 15 (4.0%)   | 631 (4.4%)    | 42 (4.3%)    |

|                                                           |              |               |             |        |               |              |        |
|-----------------------------------------------------------|--------------|---------------|-------------|--------|---------------|--------------|--------|
| Education                                                 | 817 (5.2)    | 796 (5.3%)    | 21 (5.6%)   |        | 760 (5.2%)    | 57 (5.9%)    |        |
| Other (not classified elsewhere)                          | 3182 (20.5)  | 3126 (20.7%)  | 56 (14.9%)  |        | 3007 (20.8%)  | 175 (18.1%)  |        |
| <b>Relationship with spouse</b>                           |              |               |             | <0.001 |               |              | <0.001 |
| Better                                                    | 859 (3.4)    | 818 (3.3%)    | 41 (7.8%)   |        | 781 (3.2%)    | 78 (5.4%)    |        |
| constant                                                  | 12543 (49.2) | 12422 (49.8%) | 121 (23.0%) |        | 12139 (50.5%) | 404 (28.1%)  |        |
| Worse                                                     | 1069 (4.2)   | 981 (3.9%)    | 88 (16.8%)  |        | 842 (3.5%)    | 227 (15.8%)  |        |
| Do not know                                               | 461 (1.8)    | 453 (1.8%)    | 8 (1.5%)    |        | 446 (1.9%)    | 15 (1.0%)    |        |
| Not applicable                                            | 10550 (41.4) | 10283 (41.2%) | 267 (50.9%) |        | 9835 (40.9%)  | 715 (49.7%)  |        |
| <b>Use of mask while visiting public places</b>           |              |               |             | <0.001 |               |              | <0.001 |
| Always                                                    | 21902 (86)   | 21579 (86.5%) | 323 (61.5%) |        | 20768 (86.4%) | 1134 (78.8%) |        |
| Sometime                                                  | 2511 (9.9)   | 2405 (9.6%)   | 106 (20.2%) |        | 2300 (9.6%)   | 211 (14.7%)  |        |
| Never/Rarely                                              | 1069 (4.2)   | 973 (3.9%)    | 96 (18.3%)  |        | 975 (4.1%)    | 94 (6.5%)    |        |
| <b>Walking impairment</b>                                 |              |               |             | <0.001 |               |              | <0.001 |
| No                                                        | 23085 (90.6) | 22715 (91.0%) | 370 (70.5%) |        | 21959 (91.3%) | 1126 (78.2%) |        |
| Yes                                                       | 2397 (9.4)   | 2242 (9.0%)   | 155 (29.5%) |        | 2084 (8.7%)   | 313 (21.8%)  |        |
| Use of self-prescribed drug [Mean (Sd)]                   | 6.7 (2.1)    | 6.7 (1.9)     | 8.0 (3.5)   | <0.001 | 6.7(1.9)      | 8.0 (3.5)    | <0.001 |
| Frequency of alcohol intake [Mean (Sd)]                   | 1.1(1.3)     | 2.0 (1.2)     | 2.2(1.3)    | 0.012  | 1.96 (1.1)    | 2.2(1.3)     | <0.001 |
| Presence of symptoms associated with COVID-19 [Mean (Sd)] | 0.8(1.4)     | 0.8(1.3)      | 1.9(2.4)    | <0.001 | 0.8 (1.3)     | 1.8 (2.1)    | <0.001 |

Abbreviations: AOR= adjusted odds ratio; CI = confidence interval, Sd = standard deviation

**STROBE 2007 (v4) checklist of items to be included in reports of observational studies in epidemiology\***  
**Checklist for cohort, case-control, and cross-sectional studies (combined)**

| Section/Topic             | Item # | Recommendation                                                                                                                                                                                                                                                                                                                                                                                                                                                         | Reported on page #      |
|---------------------------|--------|------------------------------------------------------------------------------------------------------------------------------------------------------------------------------------------------------------------------------------------------------------------------------------------------------------------------------------------------------------------------------------------------------------------------------------------------------------------------|-------------------------|
| Title and abstract        | 1      | (a) Indicate the study's design with a commonly used term in the title or the abstract                                                                                                                                                                                                                                                                                                                                                                                 | Page 2 [Line 31]        |
|                           |        | (b) Provide in the abstract an informative and balanced summary of what was done and what was found                                                                                                                                                                                                                                                                                                                                                                    | Page 2 [Line 24-49]     |
| <b>Introduction</b>       |        |                                                                                                                                                                                                                                                                                                                                                                                                                                                                        |                         |
| Background/rationale      | 2      | Explain the scientific background and rationale for the investigation being reported                                                                                                                                                                                                                                                                                                                                                                                   | Page 4-6 [Line 63-109]  |
| Objectives                | 3      | State specific objectives, including any pre-specified hypotheses                                                                                                                                                                                                                                                                                                                                                                                                      | Page 5-6 [Line 106-109] |
| <b>Methods</b>            |        |                                                                                                                                                                                                                                                                                                                                                                                                                                                                        |                         |
| Study design              | 4      | Present key elements of study design early in the paper                                                                                                                                                                                                                                                                                                                                                                                                                | Page 6 [Line 113-123]   |
| Setting                   | 5      | Describe the setting, locations, and relevant dates, including periods of recruitment, exposure, follow-up, and data collection                                                                                                                                                                                                                                                                                                                                        | Page 6 [Line 116-118]   |
| Participants              | 6      | (a) <i>Cohort study</i> —Give the eligibility criteria, and the sources and methods of selection of participants. Describe methods of follow-up<br><i>Case-control study</i> —Give the eligibility criteria, and the sources and methods of case ascertainment and control selection. Give the rationale for the choice of cases and controls<br><i>Cross-sectional study</i> —Give the eligibility criteria, and the sources and methods of selection of participants | Page 6 [Line 115]       |
|                           |        | (b) <i>Cohort study</i> —For matched studies, give matching criteria and number of exposed and unexposed<br><i>Case-control study</i> —For matched studies, give matching criteria and the number of controls per case                                                                                                                                                                                                                                                 | Not applicable          |
| Variables                 | 7      | Clearly define all outcomes, exposures, predictors, potential confounders, and effect modifiers. Give diagnostic criteria, if applicable                                                                                                                                                                                                                                                                                                                               | Page 6-8 [Line 125-165] |
| Data sources/ measurement | 8*     | For each variable of interest, give sources of data and details of methods of assessment (measurement). Describe comparability of assessment methods if there is more than one group                                                                                                                                                                                                                                                                                   | Page 6-8 [Line 125-165] |
| Bias                      | 9      | Describe any efforts to address potential sources of bias                                                                                                                                                                                                                                                                                                                                                                                                              | Page 8 [Line 173-177]   |
| Study size                | 10     | Explain how the study size was arrived at                                                                                                                                                                                                                                                                                                                                                                                                                              | Page 6 [Line 113-118]   |
| Quantitative variables    | 11     | Explain how quantitative variables were handled in the analyses. If applicable, describe which groupings were chosen and why                                                                                                                                                                                                                                                                                                                                           | Page 8-9 [Line 167-189] |
| Statistical methods       | 12     | (a) Describe all statistical methods, including those used to control for confounding                                                                                                                                                                                                                                                                                                                                                                                  | Page 9 [Line 182-184]   |
|                           |        | (b) Describe any methods used to examine subgroups and interactions                                                                                                                                                                                                                                                                                                                                                                                                    | Not applicable          |

|                          |     |                                                                                                                                                                                                                                                                                                                                                                                                               |                                                         |
|--------------------------|-----|---------------------------------------------------------------------------------------------------------------------------------------------------------------------------------------------------------------------------------------------------------------------------------------------------------------------------------------------------------------------------------------------------------------|---------------------------------------------------------|
|                          |     | (c) Explain how missing data were addressed                                                                                                                                                                                                                                                                                                                                                                   | Page 8 [Line 167-171]                                   |
|                          |     | (d) <i>Cohort study</i> —If applicable, explain how loss to follow-up was addressed<br><i>Case-control study</i> —If applicable, explain how matching of cases and controls was addressed<br><i>Cross-sectional study</i> —If applicable, describe analytical methods taking account of sampling strategy                                                                                                     | Not applicable                                          |
|                          |     | (e) Describe any sensitivity analyses                                                                                                                                                                                                                                                                                                                                                                         | Not applicable                                          |
| <b>Results</b>           |     |                                                                                                                                                                                                                                                                                                                                                                                                               |                                                         |
| Participants             | 13* | (a) Report numbers of individuals at each stage of study—eg numbers potentially eligible, examined for eligibility, confirmed eligible, included in the study, completing follow-up, and analysed<br>(b) Give reasons for non-participation at each stage<br>(c) Consider use of a flow diagram                                                                                                               | Page 6 [Line 114-118]<br>NA<br>NA                       |
| Descriptive data         | 14* | (a) Give characteristics of study participants (eg demographic, clinical, social) and information on exposures and potential confounders<br>(b) Indicate number of participants with missing data for each variable of interest<br>(c) <i>Cohort study</i> —Summarise follow-up time (eg, average and total amount)                                                                                           | Page 9,10 [Line 191-205]<br>NA<br>NA                    |
| Outcome data             | 15* | <i>Cohort study</i> —Report numbers of outcome events or summary measures over time<br><i>Case-control study</i> —Report numbers in each exposure category, or summary measures of exposure<br><i>Cross-sectional study</i> —Report numbers of outcome events or summary measures                                                                                                                             | NA<br>NA<br>Page 9,10,11                                |
| Main results             | 16  | (a) Give unadjusted estimates and, if applicable, confounder-adjusted estimates and their precision (eg, 95% confidence interval). Make clear which confounders were adjusted for and why they were included<br>(b) Report category boundaries when continuous variables were categorized<br>(c) If relevant, consider translating estimates of relative risk into absolute risk for a meaningful time period | Page 9-11 [Line 119-224]<br>Page 7 [Line 133-141]<br>NA |
| Other analyses           | 17  | Report other analyses done—eg analyses of subgroups and interactions, and sensitivity analyses                                                                                                                                                                                                                                                                                                                | NA                                                      |
| <b>Discussion</b>        |     |                                                                                                                                                                                                                                                                                                                                                                                                               |                                                         |
| Key results              | 18  | Summarise key results with reference to study objectives                                                                                                                                                                                                                                                                                                                                                      | Page 12 [Line 229-237]                                  |
| Limitations              | 19  | Discuss limitations of the study, taking into account sources of potential bias or imprecision. Discuss both direction and magnitude of any potential bias                                                                                                                                                                                                                                                    | Page 16 [Line 322-327]                                  |
| Interpretation           | 20  | Give a cautious overall interpretation of results considering objectives, limitations, multiplicity of analyses, results from similar studies, and other relevant evidence                                                                                                                                                                                                                                    | Page 16 [Line 333-344]                                  |
| Generalisability         | 21  | Discuss the generalisability (external validity) of the study results                                                                                                                                                                                                                                                                                                                                         | Page 16 [Line 328-331]                                  |
| <b>Other information</b> |     |                                                                                                                                                                                                                                                                                                                                                                                                               |                                                         |

1  
2  
3  
4  
5  
6  
7  
8  
9  
10  
11  
12  
13  
14  
15  
16  
17  
18  
19  
20  
21  
22  
23  
24  
25  
26  
27  
28  
29  
30  
31  
32  
33  
34  
35  
36  
37  
38  
39  
40  
41  
42  
43  
44  
45  
46

|         |    |                                                                                                                                                               |                        |
|---------|----|---------------------------------------------------------------------------------------------------------------------------------------------------------------|------------------------|
| Funding | 22 | Give the source of funding and the role of the funders for the present study and, if applicable, for the original study on which the present article is based | Page 17 [Line 350-356] |
|---------|----|---------------------------------------------------------------------------------------------------------------------------------------------------------------|------------------------|

\*Give information separately for cases and controls in case-control studies and, if applicable, for exposed and unexposed groups in cohort and cross-sectional studies.  
**Note:** An Explanation and Elaboration article discusses each checklist item and gives methodological background and published examples of transparent reporting. The STROBE checklist is best used in conjunction with this article (freely available on the Web sites of PLoS Medicine at <http://www.plosmedicine.org/>, Annals of Internal Medicine at <http://www.annals.org/>, and Epidemiology at <http://www.epidem.com/>). Information on the STROBE Initiative is available at [www.strobe-statement.org](http://www.strobe-statement.org).

For peer review only

# BMJ Open

## Physical and verbal abuse amid COVID-19: a nationwide cross-sectional survey in Japan

|                                 |                                                                                                                                                                                                                                                                                                                                                                                                                                                                                                                                           |
|---------------------------------|-------------------------------------------------------------------------------------------------------------------------------------------------------------------------------------------------------------------------------------------------------------------------------------------------------------------------------------------------------------------------------------------------------------------------------------------------------------------------------------------------------------------------------------------|
| Journal:                        | <i>BMJ Open</i>                                                                                                                                                                                                                                                                                                                                                                                                                                                                                                                           |
| Manuscript ID                   | bmjopen-2021-054915.R1                                                                                                                                                                                                                                                                                                                                                                                                                                                                                                                    |
| Article Type:                   | Original research                                                                                                                                                                                                                                                                                                                                                                                                                                                                                                                         |
| Date Submitted by the Author:   | 16-Dec-2021                                                                                                                                                                                                                                                                                                                                                                                                                                                                                                                               |
| Complete List of Authors:       | Bhandari, Divya; Medical Governance Research Institute<br>Ozaki, Akihiko; Minamisoma Municipal General Hospital, Department of Breast Surgery<br>Suzuki, Tomoya; Medical Governance Research Institute; Akita University<br>Kotera, Yasuhiro; University of Derby<br>Shrestha, Sunil; Monash University Malaysia<br>Horiuchi, Sayaka; University of Yamanashi<br>Takashi, Miyachi; Medical Governance Research Institute; Akita University<br>Tabuchi, Takahiro; Osaka Furitsu Seijinbyo Center, Center for Cancer Control and Statistics |
| <b>Primary Subject Heading</b>: | Public health                                                                                                                                                                                                                                                                                                                                                                                                                                                                                                                             |
| Secondary Subject Heading:      | Public health, Mental health, Infectious diseases, Epidemiology, Sociology                                                                                                                                                                                                                                                                                                                                                                                                                                                                |
| Keywords:                       | PUBLIC HEALTH, EPIDEMIOLOGY, HEALTH SERVICES ADMINISTRATION & MANAGEMENT                                                                                                                                                                                                                                                                                                                                                                                                                                                                  |
|                                 |                                                                                                                                                                                                                                                                                                                                                                                                                                                                                                                                           |

SCHOLARONE™  
Manuscripts





I, the Submitting Author has the right to grant and does grant on behalf of all authors of the Work (as defined in the below author licence), an exclusive licence and/or a non-exclusive licence for contributions from authors who are: i) UK Crown employees; ii) where BMJ has agreed a CC-BY licence shall apply, and/or iii) in accordance with the terms applicable for US Federal Government officers or employees acting as part of their official duties; on a worldwide, perpetual, irrevocable, royalty-free basis to BMJ Publishing Group Ltd ("BMJ") its licensees and where the relevant Journal is co-owned by BMJ to the co-owners of the Journal, to publish the Work in this journal and any other BMJ products and to exploit all rights, as set out in our [licence](#).

The Submitting Author accepts and understands that any supply made under these terms is made by BMJ to the Submitting Author unless you are acting as an employee on behalf of your employer or a postgraduate student of an affiliated institution which is paying any applicable article publishing charge ("APC") for Open Access articles. Where the Submitting Author wishes to make the Work available on an Open Access basis (and intends to pay the relevant APC), the terms of reuse of such Open Access shall be governed by a Creative Commons licence – details of these licences and which [Creative Commons](#) licence will apply to this Work are set out in our licence referred to above.

Other than as permitted in any relevant BMJ Author's Self Archiving Policies, I confirm this Work has not been accepted for publication elsewhere, is not being considered for publication elsewhere and does not duplicate material already published. I confirm all authors consent to publication of this Work and authorise the granting of this licence.

1  
2 **1 Physical and verbal abuse amid COVID-19: a nationwide cross-sectional survey in Japan**  
3

4  
5 2 Divya Bhandari,<sup>1</sup> Akihiko Ozaki,<sup>1,2</sup> Tomoya Suzuki,<sup>1,3</sup> Yasuhiro Kotera,<sup>4</sup> Sunil Shrestha,<sup>5</sup> Sayaka  
6

7 3 Horiuchi,<sup>6</sup> Miyachi Takashi,<sup>1,3</sup> Takahiro Tabuchi<sup>7</sup>  
8  
9

10 4

11  
12  
13 5 1. Medical Governance Research Institute, Tokyo, Japan  
14

15  
16 6 2. Department of Breast Surgery, Jyoban Hospital of Tokiwa Foundation, Iwaki, Fukushima,  
17  
18 7 Japan  
19

20  
21 8 3. Faculty of Medicine, Akita University, Akita, Japan  
22

23  
24 9 4. Centre for Human Sciences Research, University of Derby, Derby, UK.  
25

26  
27 10 5. School of Pharmacy, Monash University Malaysia, Jalan Lagoon Selatan, 47500 Bandar  
28  
29 11 Sunway, Selangor, Malaysia  
30

31  
32 12 6. Center for Birth Cohort Studies, University of Yamanashi, Yamanashi, Japan  
33

34  
35 13 7. Cancer Control Center, Osaka International Cancer Institute, Osaka, Japan  
36

37  
38 14  
39

40  
41 15  
42

43  
44 16 \*Corresponding author  
45

46  
47 17 Divya Bhandari  
48

49  
50 18 Researcher, Medical Governance Research Institute, Tokyo, Japan  
51

52  
53 19 E-mail: rayordeal3@gmail.com ; Contact: 070-4454-0319  
54

55 20 Postal address: 108-0074, 2-12-13 Takanawa Residence Takanawa 201 Minato-ku, Tokyo, Japan  
56

57 21  
58

## 22 **Abstract**

### 23 **Objectives**

24 The detrimental impacts of abuse on victims' well-being are well documented globally,  
25 including Japan. The ongoing COVID-19 pandemic may increase the incidence of abuse in the  
26 community, creating an additional burden amid the crisis. However, the incidence of abuse in  
27 Japan during COVID-19 remains to be evaluated. Accordingly, our study aimed to assess the  
28 incidence of physical and verbal abuse among the general population in Japan and to identify the  
29 associated factors of abuse during COVID-19.

### 30 **Design and setting**

31 We used the data obtained from a nationwide, cross-sectional internet survey conducted in Japan  
32 between August and September 2020. Sampling weights were used to calculate national  
33 estimates, and multivariable logistic regression was performed to identify the associated factors  
34 for physical and verbal abuse.

### 35 **Results**

36 Out of the total 25,482 participants, 965 (3.8 %) reported experiencing physical abuse and 1941  
37 (7.6%) verbal abuse from April 2020 to September 2020. The incidence of physical and verbal  
38 abuse was higher among female participants. Participants who lived in areas where the "state of  
39 emergency" was enforced were more likely to suffer from physical abuse. Similarly, vulnerable  
40 participants such as those below age 18, with low income, bad family relationships, and disabled  
41 people were more likely to experience both physical and verbal abuse. Participants suffering  
42 from COVID-19 related symptoms, who had poor health status and widows/divorcees were more  
43 likely to be verbally abused. Furthermore, those who did not follow preventive behaviors such as  
44 wearing masks in public places, abusing drugs, and drinking alcohol in high amounts were also  
45 more likely to experience abuse.

1  
2 46  
34 47 **Conclusion**

5  
6 48 The impact of abuse was found disproportionately greater in more vulnerable groups of the  
7  
8  
9 49 population. Pandemic has reinforced the existing social inequalities, which need to be addressed  
10  
11 50 timely to prevent precarious repercussions.  
12

13 51

14  
15 52 **Keywords:** physical abuse, verbal abuse, Japan, pandemic, social inequality, vulnerable  
16  
17  
18 53 population  
19

20 54

21  
22 55 **Word count:** 3295  
23  
24

25 56

26  
27 57 **Strength and Limitation of the study**

- 28  
29  
30  
31 58 • This is the nationwide cross-sectional study exploring the incidence of abuse amid  
32  
33 59 COVID-19.  
34  
35 60 • An inverse probability weighting approach was employed to adjust the difference on the  
36  
37 61 internet and the nationally representative sample.  
38  
39 62 • Multivariable logistic regression was used to adjust for possible confounders and to  
40  
41 63 evaluate the association.  
42  
43 64 • A cross-sectional design was used which limited our ability to establish causality.  
44  
45 65 • Due to the self-reported nature of the survey data, there could be a chance of under- and  
46  
47 66 over-reporting.  
48  
49  
50

51 67  
52  
53  
54  
55  
56  
57

## 68 Introduction

69 Abuse is a serious public health problem that fundamentally violates human rights. Globally, one  
70 in three women and one in five men have been subjected to different forms of violence.<sup>1,2</sup> In the  
71 United States alone, 20 people per minute are physically abused by their partner, equating to  
72 more than 10 million women and men in one year.<sup>3,4</sup> Although the incidence of abuse is highly  
73 prevalent among women, it is not limited to particular gender only. All people, regardless of their  
74 races, cultures, or sexual orientations are exposed to abuse and have to deal with it in their  
75 lifetime.<sup>5</sup> Exposure to any kind of abuse is stressful whether it be physical abuse (infliction of  
76 physical pain by hitting, punching, strangling, restraining, pushing, or slapping), verbal abuse  
77 (demonstrating mental anguish by shouting and yelling), sexual abuse (threats of unwanted  
78 sexual contact or forced sex), or emotional abuse.<sup>6</sup>

79  
80 With the advent of COVID-19, the incidence of abuse has become more apparent than ever  
81 before.<sup>7</sup> Travel restrictions and stay-at-home orders adopted to curb the spread of the virus have  
82 a profound impact on society leading to social, financial, and psychological repercussions.<sup>8</sup>  
83 Stay-at-home orders have exacerbated the vulnerabilities of individuals whose lives are already  
84 afflicted by domestic violence.<sup>9</sup> Furthermore, business closures have significantly increased the  
85 unemployment rate and economic strain; all this has negatively impacted the mental health of the  
86 general population.<sup>10,11</sup> Financial hardships, increased threats to physical health coupled with  
87 their daily responsibilities have made people more violent and aggressive.<sup>12</sup> While hotlines have  
88 been receiving complaints of domestic violence,<sup>13,14</sup> multiple instances of abuse were also seen  
89 outside the closed room among general people. Some instances include abusing health workers

1  
2 90 for spreading COVID-19,<sup>15</sup> abusing people for not wearing masks,<sup>16,17</sup> for not being able to pay  
3  
4 91 room rents,<sup>18</sup>, etc.  
5

6 92  
7  
8  
9 93 The consequences of such abuse are deleterious and can result in long-term damage to victims'  
10  
11 94 physical and mental well-being.<sup>19,20</sup> While physical abuse has direct effects on the physical body,  
12  
13 95 verbal abuse affects victims' thoughts and emotions. The immediate effects of physical abuse  
14  
15 96 include bruises, cuts, fractures, loss of teeth/hair, miscarriage, etc.<sup>21</sup> Verbal abuse does not  
16  
17 97 manifest visible effects immediately; however, it directly affects the victims' self-esteem.  
18  
19  
20 98 Prolonged exposure to abuse can lead to various mental health problems, including depression,  
21  
22 99 anxiety, and posttraumatic stress disorder (PTSD).<sup>22,23</sup> Victims are 1.7 to 4.6 times more likely to  
23  
24 100 develop an anxiety disorder, PTSD, or eating disorder.<sup>24,25</sup> Similarly, the effects on physical  
25  
26 101 health include the higher age-adjusted mortality rates and various chronic health problems such  
27  
28 102 as asthma, epilepsy, migraines, hypertension, etc.<sup>26-28</sup>. Under current stressful living conditions,  
29  
30 103 the additional burden of abuse could take a heavy toll on people.  
31  
32  
33

34 104  
35  
36 105 In Japan, spousal, elderly, and child abuse have been noted from time to time. In 2019, more than  
37  
38 106 80,000 cases of domestic violence consultations were reported.<sup>29</sup> Similarly, the prevalence of  
39  
40 107 elder abuse was found to be 12.3%, with 2.6% experiencing physical abuse and 11.6%  
41  
42 108 experiencing verbal abuse.<sup>30</sup> Furthermore, as mentioned above, COVID-19 has created a  
43  
44 109 situation of widespread uncertainty and panic which might stimulate abuse in the community.  
45  
46 110 Apparently, as mentioned on various news portals, multiple cases of abuse were reported among  
47  
48 111 the general population in Japan.<sup>31,32</sup> However, detailed study on this issue among the general  
49  
50 112 population has not been done yet. Taken together, our study aimed to i) identify the incidence of  
51  
52  
53  
54  
55  
56  
57  
58  
59  
60

1  
2 113 physical and verbal abuse among the general population of Japan amid COVID-19 and ii)  
3  
4 114 investigate factors associated with such abuses.  
5

6  
7 115

## 10 116 **Methods**

### 13 117 **Settings and Participants**

16  
17 118 We used the data from Japan COVID-19 and Society Internet Survey study` (JACSIS) collected  
18  
19 119 by a large internet research agency Rakuten Insight, Inc, which had approximately 2.3 million  
20  
21 120 registered qualified panelists. JACSIS study was designed to recruit a “nationally representative  
22  
23 121 sample” to calculate national estimates. Therefore, a large sample size of 28000 was determined  
24  
25 122 in advance according to the population distribution of Japan in 2019 and a response rate of  
26  
27 123 12.5% (28000/224389). Regarding the sampling method, out of 2.2 million registered panelists,  
28  
29 124 224389 panelists were invited using stratified random sampling by sex, age, and prefectures. The  
30  
31 125 random selection was done using computer algorithms and then email invitations were sent to  
32  
33 126 selected participants. The survey was terminated once the target number of respondents was  
34  
35 127 reached for each category. Questionnaires were distributed from August 25, 2020, and were  
36  
37 128 completed on September 30, 2020, after reaching a total target sample size of 28,000 participants  
38  
39 129 from all 47 prefectures. The questionnaire used in this study was adopted from a previously  
40  
41 130 validated questionnaire developed by Koga et al.<sup>33,34</sup> Questionnaire was administered in the  
42  
43 131 Japanese language and a link to the questionnaire is available on the JACSIS website.<sup>35</sup>  
44  
45  
46  
47  
48  
49  
50

51  
52  
53  
54  
55  
56  
57  
58  
59  
60

## 133 **Ethical approval**

134 The ethical approval was received from the Research Ethics Committee of the Osaka  
135 International Cancer Institute (Approval No. 20084). Web-based informed consent was obtained  
136 from the participants before providing access to the main questionnaire. Participants had an  
137 option to discontinue at any time during the survey. Participants involved in the study were  
138 provided with “e-points”, credit points that can be used for internet shopping.

## 140 **Patient and public involvement**

141 There were no patients involved in this study

## 142 **Outcome variable and assessment**

143 **Physical and verbal abuse:** Participants were asked whether they encountered any form of  
144 physical or verbal abuse from April 2020 (from emergency declaration due to COVID-19) to the  
145 data collection period. They were asked whether they were physically assaulted by anyone such  
146 as being punched, kicked, thrown, or locked in the room. Similarly, they were asked if they were  
147 verbally abused or ignored for a long time or encountered any self-esteem damaging behaviors  
148 from others. Responses were measured in the binary outcome, “Yes” and “No” each.

## 150 **Exposure variables and assessment**

151 **Socio-demographic characteristics:** The demographics included age (categorized as: below 18,  
152 18-40, 40-60 and above 60), gender, education levels (junior high school, high school, college,  
153 university, and others), marital status (with a spouse, unmarried, widow/widower, divorced, job



1  
2 154 sector (public servant, agriculture, working in the industry, business, medical care, education,  
3  
4 155 and other services), work from home since March or April (yes, no), and relationship with a  
5  
6 156 spouse (better, constant, worse, do not know, not applicable). The crowding index was calculated  
7  
8  
9 157 by dividing the total number of residents in a household by the total number of rooms in the  
10  
11 158 house (excluding the kitchen and bathroom). It was categorized into less than 1, 1-2, more than 2  
12  
13 159 during analysis.<sup>36</sup> Similarly for annual household income, quartile was calculated and used for  
14  
15 160 categorization (less than 3, 3-4 million, 4-7 million, higher than 7 million, and did not want to  
16  
17 161 disclose).

18  
19  
20 162  
21  
22  
23 163 **Personal health status:** Participants were asked about their perceived health status, presence of  
24  
25 164 walking impairment/disability, and presence of any COVID-19-related symptoms. Perceived  
26  
27 165 health status was asked in the five-item Likert scale from “good” to “not good”. It was later  
28  
29 166 recategorized into three categories (good, usual, and poor) for the analysis. Similarly, symptoms  
30  
31 167 associated with COVID-19 were asked such as high fever, fatigue, sore throat, cough, nausea,  
32  
33 168 smell disorder, etc. which were considered to have high sensitivity and specificity.<sup>37</sup> Responses  
34  
35 169 were measured as binary options “Yes” (presence of any symptoms) and “No” (absence of any  
36  
37 170 symptoms).

38  
39  
40  
41 171  
42  
43 172 **Prefecture-wise COVID-19 infection and Emergency declaration:** The number of COVID-19  
44  
45 173 cases by prefecture was calculated from January 15, 2020, to September 30, 2020. They were  
46  
47 174 divided by the population per prefecture based on the estimate on October 1, 2019. During  
48  
49 175 analyses, the number of COVID-19 cases/prefecture was divided into three categories using  
50  
51 176 quartile (lowest, medium, and highest).

1  
2 177 For the emergency declaration variable, three categories were created; category 1 included  
3  
4 178 prefectures where the state of emergency was enforced, category 2 included the prefecture with  
5  
6 179 specific alerts and category 3 included the remaining prefecture.  
7  
8  
9 180

10  
11 181 **Personal Behaviors:** Personal behaviors were also included such as substance abuse, alcohol  
12  
13 182 intake, and use of face masks in the public areas. The alcohol intake was measured in three  
14  
15 183 categories –“increased”, “same/as usual”, and “decrease”. These categories were used to  
16  
17 184 compare the change in the drinking habit before and after the COVID-19 pandemic. For  
18  
19 185 substance abuse, participants were asked about the use of different kinds of harmful drugs  
20  
21 186 (without any prescription from physicians). Responses were measured in “no”, “before but not  
22  
23 187 now” and “yes”. Similarly, participants were asked about their practice of using facemasks while  
24  
25 188 out in public. Responses were measured in three categories: “always”, “sometimes”, and  
26  
27 189 “never/rarely”.  
28  
29  
30  
31

32 190

## 33 34 191 **Data analysis**

35  
36  
37  
38 192 Out of 28,000 responses collected, 25,482 were included in the analysis after removing  
39  
40 193 discrepancies and unnatural responses. Three criteria were used to detect such discrepancies; i)  
41  
42 194 those who selected "yes" to all asked diseases listed ii) those who ticked wrong response to the  
43  
44 195 verification question “Please choose the second from the bottom”, iii) those who selected all  
45  
46 196 options for drug use behaviors, who were then removed from the analysis.  
47  
48  
49 197 First, we compared the socio-demographic characteristics and all other exposure variables among  
50  
51 198 participants experiencing physical abuse and those who did not. The same procedure was applied  
52  
53 199 for verbal abuse as well. As participants who participated in the internet-based survey might  
54  
55 200 differ from the general population, we used an inverse probability weighting (IPW) approach  
56  
57  
58  
59

1  
2 201 throughout the analyses to adjust the difference of response between the current internet survey  
3  
4 202 and the nationally representative survey. Propensity scores were calculated by logistic regression  
5  
6 203 analysis using sex, age, and socioeconomic factors to adjust for differences between a current  
7  
8 204 and population-based sample from the Comprehensive Survey of Living Conditions of People on  
9  
10 205 Health and Welfare 2016. Detailed methods (e.g. participation rate and data management) are  
11  
12 206 presented in the previous study.<sup>38</sup>  
13  
14  
15 207 Second, we performed simple and multivariable logistic regression to identify the factors  
16  
17 208 associated with physical and verbal abuse. For each outcome, we constructed two regression  
18  
19 209 models to control for potential confounders. We considered all variables using the backward  
20  
21 210 stepwise variable selection method ( $p > 0.05$ ). Variables having categories with a small number of  
22  
23 211 participants were regrouped as appropriate. Weighted multivariable logistic regression models,  
24  
25 212 with standard error (SEs) clustered at the prefecture level, were used to account for the potential  
26  
27 213 correlation of respondents within the same prefecture. A separate analysis was conducted for  
28  
29 214 both physical and verbal abuse.  
30  
31  
32  
33  
34

## 35 **Results**

36  
37  
38 216 Table 1 shows the characteristics of participants experiencing physical and verbal abuse.  
39  
40 217 Analyses were weighted to adjust the difference between participants in this internet survey and  
41  
42 218 national representative samples.  
43  
44 219 Of the total, 965 (3.8%) participants experienced physical abuse and 1941 (7.6%) encountered  
45  
46 220 verbal abuse. Both the incidence of physical and verbal abuse was highest among the female  
47  
48 221 participants and participants in the age group 18-40 years. Among participants experiencing  
49  
50 222 physical abuse, 209 (21.7%) mentioned having “poor” health status, 356 (36.9%) were working  
51  
52 223 from home and 91 (9.5%) had the worst relationship with their spouse. Similarly, 339 (35.2%) of  
53  
54  
55  
56  
57  
58  
59  
60

1  
2 224 participants had increased their alcohol intake, 222 (23.0%) were abusing drugs, and 491  
3  
4 225 (50.9%) experienced symptoms related to COVID-19. Among participants experiencing verbal  
5  
6 226 abuse, 1,143 (58.9%) were working from home, 607 (31.3%) had an annual household income of  
7  
8  
9 227 less than 3 million, 710 (36.6%) had a “poor” health status, 583 (30.1 %) increased their alcohol  
10  
11 228 intake, and 394 (20.3%) had the worst relationship with their spouse.  
12  
13  
14  
15  
16  
17  
18  
19  
20  
21  
22  
23  
24  
25  
26  
27  
28  
29  
30  
31  
32  
33  
34  
35  
36  
37  
38  
39  
40  
41  
42  
43  
44  
45  
46  
47  
48  
49  
50  
51  
52  
53  
54  
55  
56  
57  
58  
59  
60

For peer review only

**Table 1: Characteristics of participants experiencing physical and verbal abuse (N= 25,482)**

| Variables                                        | Total<br>n | Physical Abuse |        |       |        | Verbal Abuse |        |       |        |
|--------------------------------------------------|------------|----------------|--------|-------|--------|--------------|--------|-------|--------|
|                                                  |            | Yes            |        | No    |        | Yes          |        | No    |        |
|                                                  |            | n              | %      | n     | %      | n            | (%)    | n     | (%)    |
|                                                  |            | 965            | 3.8    | 24517 | 96.2   | 1941         | 7.6    | 23541 | 92.4   |
| <b>Age</b>                                       |            |                |        |       |        |              |        |       |        |
| Below 18                                         | 651        | 71             | (7.4)  | 579   | (2.4)  | 72           | (3.7)  | 579   | (2.5)  |
| 18-40                                            | 7541       | 691            | (71.7) | 6850  | (27.9) | 950          | (49)   | 6591  | (28.0) |
| 40-60                                            | 9150       | 142            | (14.7) | 9008  | (36.7) | 558          | (28.8) | 8592  | (36.5) |
| Above 60                                         | 8140       | 60             | (6.2)  | 8080  | (33.0) | 360          | (18.6) | 7780  | (33.0) |
| <b>Sex</b>                                       |            |                |        |       |        |              |        |       |        |
| Female                                           | 12673      | 708            | (73.3) | 11965 | (48.8) | 1,078        | (55.5) | 11595 | (49.3) |
| Male                                             | 12809      | 257            | (26.7) | 12552 | (51.2) | 863          | (44.5) | 11946 | (50.7) |
| <b>Education Level</b>                           |            |                |        |       |        |              |        |       |        |
| Junior High School                               | 1732       | 74             | (7.6)  | 1658  | (6.8)  | 108          | (5.6)  | 1624  | (6.9)  |
| High School                                      | 9640       | 256            | (26.5) | 9385  | (38.3) | 454          | (23.4) | 9186  | (39.0) |
| College                                          | 4928       | 101            | (10.5) | 4827  | (19.7) | 329          | (17.0) | 4599  | (19.5) |
| University and others                            | 9182       | 535            | (55.4) | 8647  | (35.3) | 1,050        | (54.1) | 8132  | (34.5) |
| <b>Marital Status</b>                            |            |                |        |       |        |              |        |       |        |
| With spouse                                      | 16100      | 257            | (26.6) | 15844 | (64.6) | 895          | (46.1) | 15205 | (64.6) |
| Unmarried                                        | 6046       | 192            | (19.8) | 5854  | (23.9) | 452          | (23.3) | 5594  | (23.8) |
| Widow/Widower                                    | 1949       | 504            | (52.2) | 1446  | (5.9)  | 521          | (26.8) | 1428  | (6.1)  |
| Divorced                                         | 1387       | 13             | (1.4)  | 1373  | (5.6)  | 73           | (3.8)  | 1314  | (5.6)  |
| <b>Annual Household Income</b>                   |            |                |        |       |        |              |        |       |        |
| Less than 3 million                              | 4712       | 255            | (26.4) | 4457  | (18.2) | 607          | (31.3) | 4104  | (17.4) |
| 3-4 million                                      | 2948       | 159            | (16.4) | 2789  | (11.4) | 272          | (14.0) | 2675  | (11.4) |
| 4-7 million                                      | 6512       | 110            | (11.4) | 6402  | (26.1) | 407          | (21.0) | 6105  | (25.9) |
| Higher than 7 million                            | 5716       | 354            | (36.7) | 5362  | (21.9) | 422          | (21.7) | 5294  | (22.5) |
| Prefer not to disclose                           | 5595       | 88             | (9.1)  | 5508  | (22.5) | 233          | (12.0) | 5363  | (22.8) |
| <b>Crowding index</b>                            |            |                |        |       |        |              |        |       |        |
| Less than or equal to one                        | 18728      | 557            | (57.7) | 18172 | (74.1) | 1,171        | (60.4) | 17557 | (74.6) |
| One -Two                                         | 6228       | 274            | (28.4) | 5954  | (24.3) | 616          | (31.7) | 5612  | (23.8) |
| More than two                                    | 526        | 135            | (13.9) | 391   | (1.6)  | 154          | (7.9)  | 373   | (1.6)  |
| <b>Prefecture by level of Covid-19 infection</b> |            |                |        |       |        |              |        |       |        |
| High                                             | 3541       | 428            | (44.3) | 3113  | (12.7) | 148          | (7.6)  | 3393  | (14.4) |
| Moderate                                         | 8885       | 266            | (27.6) | 8619  | (35.2) | 880          | (45.3) | 8005  | (34.0) |
| Low                                              | 13056      | 271            | (28.1) | 12785 | (52.1) | 913          | (47.1) | 12143 | (51.6) |
| <b>Areas under restriction due to COVID-19</b>   |            |                |        |       |        |              |        |       |        |
| Restricted Areas/Emergency Declaration           | 7251       | 601            | (62.3) | 6650  | (27.1) | 671          | (34.6) | 6580  | (28)   |
| Specific alert only                              | 3790       | 59             | (6.1)  | 3731  | (15.2) | 158          | (8.1)  | 3632  | (15.4) |
| No restriction                                   | 14441      | 305            | (31.6) | 14137 | (57.7) | 1,112        | (57.3) | 13329 | (56.6) |

|                                              |        |     |        |        |        |       |        |        |        |
|----------------------------------------------|--------|-----|--------|--------|--------|-------|--------|--------|--------|
| <b>Perceived Health status</b>               |        |     |        |        |        |       |        |        |        |
| Good                                         | 10249  | 332 | (34.4) | 9917   | (40.5) | 710   | (36.6) | 9539   | (40.5) |
| Usual                                        | 11787  | 424 | (44.0) | 11363  | (46.3) | 521   | (26.9) | 11266  | (47.9) |
| Poor                                         | 3446   | 209 | (21.7) | 3237   | (13.2) | 710   | (36.6) | 2736   | (11.6) |
| <b>Work from home</b>                        |        |     |        |        |        |       |        |        |        |
| No                                           | 12653  | 609 | (63.1) | 12044  | (49.1) | 798   | (41.1) | 11855  | (50.4) |
| Yes                                          | 12829  | 356 | (36.9) | 12473  | (50.9) | 1,143 | (58.9) | 11686  | (49.6) |
| <b>Employment Sector</b>                     |        |     |        |        |        |       |        |        |        |
| Public servant                               | 992    | 146 | (15.1) | 847    | (3.5)  | 42    | (2.1)  | 951    | (4.0)  |
| Agriculture                                  | 222    | 11  | (1.2)  | 210    | (0.9)  | 20    | (1.0)  | 202    | (0.9)  |
| Industry                                     | 5212   | 214 | (22.2) | 4998   | (20.4) | 387   | (20.0) | 4824   | (20.5) |
| Business                                     | 2773   | 54  | (5.6)  | 2719   | (11.1) | 163   | (8.4)  | 2610   | (11.1) |
| Food and Beverage                            | 502    | 10  | (1.0)  | 492    | (2.0)  | 55    | (2.8)  | 446    | (1.9)  |
| Medical                                      | 1189   | 54  | (5.6)  | 1,135  | (4.6)  | 67    | (3.4)  | 1122   | (4.8)  |
| Welfare                                      | 690    | 19  | (1.9)  | 671    | (2.7)  | 45    | (2.3)  | 645    | (2.7)  |
| Education                                    | 937    | 10  | (1.0)  | 927    | (3.8)  | 163   | (8.4)  | 774    | (3.3)  |
| Other (not classified elsewhere)             | 3245   | 298 | (30.9) | 2,946  | (12.0) | 339   | (17.5) | 2906   | (12.3) |
| Not working                                  | 9722   | 149 | (15.5) | 9,573  | (39.0) | 660   | (34.0) | 9062   | (38.5) |
| <b>Relationship with spouse</b>              |        |     |        |        |        |       |        |        |        |
| Better                                       | 935    | 26  | (2.7)  | 909    | (3.7)  | 303   | (15.6) | 632    | (2.7)  |
| Constant                                     | 13656  | 379 | (39.3) | 13277  | (54.2) | 659   | (34.0) | 12996  | (55.2) |
| Worse                                        | 1221   | 91  | (9.5)  | 1129   | (4.6)  | 394   | (20.3) | 827    | (3.5)  |
| Don't know                                   | 553    | 10  | (1.1)  | 542    | (2.2)  | 14    | (0.7)  | 539    | (2.3)  |
| Not applicable                               | 9119   | 459 | (47.5) | 8660   | (35.3) | 571   | (29.4) | 8548   | (36.3) |
| <b>Wearing face mask while out in public</b> |        |     |        |        |        |       |        |        |        |
| Always                                       | 21244  | 327 | (33.9) | 20917  | (85.3) | 1,578 | (81.3) | 19666  | (83.5) |
| Sometime                                     | 2774   | 327 | (33.9) | 2448   | (10.0) | 300   | (15.5) | 2474   | (10.5) |
| Never/Rarely                                 | 1464   | 312 | (32.3) | 1152   | (4.7)  | 63    | (3.2)  | 1401   | (6.0)  |
| <b>Walking impairment/Disability</b>         |        |     |        |        |        |       |        |        |        |
| No                                           | 21939  | 367 | (38.0) | 21572  | (88.0) | 1,062 | (54.7) | 20877  | (88.7) |
| Yes                                          | 3543   | 598 | (62.0) | 2945   | (12.0) | 879   | (45.3) | 2664   | (11.3) |
| <b>Practice of substance abuse</b>           |        |     |        |        |        |       |        |        |        |
| Never                                        | 18,382 | 254 | (26.4) | 18,128 | (73.9) | 775   | (39.9) | 17,607 | (74.8) |
| Before but not now                           | 4,719  | 488 | (50.6) | 4,230  | (17.3) | 883   | (45.5) | 3,836  | (16.3) |
| Yes                                          | 2,381  | 222 | (23.0) | 2,159  | (8.8)  | 283   | (14.6) | 2,098  | (8.9)  |
| <b>Alcohol intake after COVID-19</b>         |        |     |        |        |        |       |        |        |        |
| Increased                                    | 2,416  | 339 | (35.2) | 2,077  | (8.5)  | 583   | (30.1) | 1,833  | (7.8)  |
| Haven't changed/same                         | 19,092 | 545 | (56.5) | 18,547 | (75.6) | 925   | (47.7) | 18,167 | (77.2) |
| Decreased                                    | 3,974  | 80  | (8.3)  | 3,894  | (15.9) | 433   | (22.3) | 3,541  | (15.0) |
| <b>Presence of COVID-19 related symptoms</b> |        |     |        |        |        |       |        |        |        |
| No                                           | 21,258 | 474 | (49.1) | 20,784 | (84.8) | 1,192 | (61.4) | 20,066 | (85.2) |
| Yes                                          | 4,224  | 491 | (50.9) | 3,733  | (15.2) | 749   | (38.6) | 3,475  | (14.8) |

1  
2 229 Table 2 demonstrates the result of multivariable logistic regression analysis of the associated  
3  
4 230 factors for physical and verbal abuse. Participants aged 40 and above were less likely to  
5  
6 231 experience physical (Adjusted Odds Ratio [AOR] = 0.05; 95% Confidence Interval [CI] = 0.02 -  
7  
8 232 0.16) and verbal abuse (AOR = 0.35; 95% CI = 0.16 - 0.79) compared to participants below age  
9  
10  
11 233 18. Unmarried, widows/widowers, and divorcées were more likely to experience verbal abuse  
12  
13 234 compared to married ones. Moreover, participants with an annual household income of 4-7  
14  
15 235 million were less likely to experience physical abuse (AOR = 0.53, 95% CI = 0.28-0.99)  
16  
17 236 compared to participants with a household income of less than 3 million. Participants living in  
18  
19 237 areas where the restriction was imposed due to COVID-19 were more likely to experience  
20  
21 238 physical abuse (AOR = 2.61, 95% CI = 1.05-6.50) compared to those living in areas without  
22  
23 239 restriction. Similarly, participants living in crowded households were more likely to experience  
24  
25 240 physical abuse (AOR = 2.62, 95% CI = 1.00-6.83). Participants who were not wearing masks  
26  
27 241 regularly in public places were more likely to experience both physical (AOR = 5.46, 95% CI =  
28  
29 242 3.84- 7.76) and verbal abuse (AOR = 3.38, 95% CI = 1.83 – 6.23). Participants with increase  
30  
31 243 alcohol intake and who have been abusing drugs were also more likely to experience both  
32  
33 244 physical and verbal abuse. Participants with poor health status (AOR = 1.99, 95% CI = 1.36 –  
34  
35 245 2.93) and who had symptoms associated with COVID-19 (AOR = 1.56, 95% CI = 1.21 – 2.03)  
36  
37 246 were more likely to experience verbal abuse.  
38  
39  
40  
41  
42  
43  
44  
45  
46  
47  
48  
49  
50  
51  
52  
53  
54  
55  
56  
57  
58  
59  
60

251 **Table 2: Factors associated with the physical and verbal abuse (N= 25,482)**

| Variables                                      | Physical Abuse |               |         | Verbal abuse |                |         |
|------------------------------------------------|----------------|---------------|---------|--------------|----------------|---------|
|                                                | AOR            | (95% CI)      | P-value | AOR          | (95% CI)       | P-value |
| <b>Age</b>                                     |                |               |         |              |                |         |
| Below 18                                       | Ref            |               |         | Ref          |                |         |
| 18-40                                          | 0.10           | (0.03 - 0.33) | <0.001  | 0.38         | (0.17 - 0.89)  | 0.025   |
| 40-60                                          | 0.05           | (0.02 - 0.16) | <0.001  | 0.35         | (0.16 - 0.79)  | 0.011   |
| Above 60                                       | 0.02           | (0.00 - 0.08) | <0.001  | 0.20         | (0.07 - 0.57)  | 0.003   |
| <b>Marital status</b>                          |                |               |         |              |                |         |
| With spouse                                    | Ref            |               |         | Ref          |                |         |
| Unmarried                                      | 0.73           | (0.35 - 1.48) | 0.379   | 3.90         | (1.89 - 8.08)  | <0.001  |
| Widow/Widower                                  | 2.54           | (0.78 - 8.29) | 0.121   | 3.79         | (1.32 - 10.85) | 0.013   |
| Divorced                                       | 0.42           | (0.17 - 1.02) | 0.056   | 2.73         | (1.32 - 5.66)  | 0.007   |
| <b>Annual household income</b>                 |                |               |         |              |                |         |
| Less than 3 million                            | Ref            |               |         | Ref          |                |         |
| 3-4 million                                    | 1.15           | (0.37 - 3.63) | 0.807   | 0.77         | (0.53 - 1.11)  | 0.166   |
| 4-7 million                                    | 0.53           | (0.28 - 0.99) | 0.048   | 0.77         | (0.43 - 1.37)  | 0.373   |
| Higher than 7 million                          | 0.56           | (0.19 - 1.64) | 0.287   | 0.65         | (0.31 - 1.36)  | 0.252   |
| Prefer not to disclose                         | 0.44           | (0.23 - 0.83) | 0.012   | 0.53         | (0.35 - 0.79)  | 0.002   |
| <b>Crowding index</b>                          |                |               |         |              |                |         |
| Less than or equal to one                      | Ref            |               |         | Ref          |                |         |
| One -Two                                       | 0.93           | (0.64 - 1.37) | 0.729   | 1.00         | (0.79 - 1.27)  | 0.999   |
| More than two                                  | 2.62           | (1.00 - 6.83) | 0.049   | 1.44         | (0.82 - 2.53)  | 0.201   |
| <b>Areas under restriction due to COVID-19</b> |                |               |         |              |                |         |
| Restricted Areas/Emergency Declaration         | 2.61           | (1.05 - 6.50) | 0.039   | 1.37         | (0.93 - 2.02)  | 0.108   |
| Specific alert only                            | 1.54           | (0.59 - 4.00) | 0.379   | 0.80         | (0.57 - 1.12)  | 0.189   |
| No restriction                                 | Ref            |               |         | Ref          |                |         |
| <b>Perceived health status</b>                 |                |               |         |              |                |         |
| Good                                           | Ref            |               |         | Ref          |                |         |
| Usual                                          | 0.94           | (0.60 - 3.66) | 0.393   | 0.79         | (0.57 - 1.10)  | 0.156   |
| Poor                                           | 0.94           | (0.32 - 4.79) | 0.751   | 1.99         | (1.36 - 2.93)  | <0.001  |
| <b>Relationship with spouse</b>                |                |               |         |              |                |         |
| Better                                         | Ref            |               |         | Ref          |                |         |



1  
2  
3  
4  
5  
6  
7  
8  
9  
10  
11  
12  
13  
14  
15  
16  
17  
18  
19  
20  
21  
22  
23  
24  
25  
26  
27  
28  
29  
30  
31  
32  
33  
34  
35  
36  
37  
38  
39  
40  
41  
42  
43  
44  
45  
46  
47

|                                              |      |                |        |      |               |        |
|----------------------------------------------|------|----------------|--------|------|---------------|--------|
| Constant                                     | 3.04 | (0.60 - 15.46) | 0.180  | 0.42 | (0.27 - 0.66) | <0.001 |
| Worse                                        | 6.33 | (1.18 - 33.99) | 0.031  | 2.09 | (1.16 - 3.75) | 0.013  |
| Don't know                                   | 2.53 | (0.39 - 16.33) | 0.329  | 0.24 | (0.11 - 0.48) | <0.001 |
| Not applicable                               | 2.68 | (0.62 - 11.51) | 0.186  | 0.14 | (0.06 - 0.32) | <0.001 |
| <b>Wearing face mask while out in public</b> |      |                |        |      |               |        |
| Always                                       | Ref  |                |        | Ref  |               |        |
| Sometime                                     | 4.32 | (2.65 - 7.03)  | <0.001 | 0.97 | (0.66 - 1.43) | 0.871  |
| Never/Rarely                                 | 5.46 | (3.84 - 7.76)  | <0.001 | 3.38 | (1.83 - 6.23) | 0.001  |
| <b>Walking impairment</b>                    |      |                |        |      |               |        |
| No                                           | Ref  |                |        | Ref  |               |        |
| Yes                                          | 2.33 | (1.45 - 3.74)  | <0.001 | 2.25 | (1.48 - 3.43) | <0.001 |
| <b>Practice of substance abuse</b>           |      |                |        |      |               |        |
| Never                                        | Ref  |                |        | Ref  |               |        |
| Before but not now                           | 1.49 | (1.05 - 2.10)  | 0.025  | 2.29 | (1.29 - 4.05) | 0.004  |
| Yes                                          | 4.24 | (2.43 - 7.41)  | <0.001 | 2.27 | (1.43 - 3.59) | <0.001 |
| <b>Alcohol intake after COVID-19</b>         |      |                |        |      |               |        |
| Increased                                    | Ref  |                |        | Ref  |               |        |
| Have not changed/same                        | 0.31 | (0.18 - 0.53)  | <0.001 | 0.49 | (0.38 - 0.63) | <0.001 |
| Decreased                                    | 0.32 | (0.15 - 0.64)  | 0.001  | 0.80 | (0.53 - 1.22) | 0.302  |
| <b>Presence of COVID-19 related symptoms</b> |      |                |        |      |               |        |
| No                                           | Ref  |                |        | Ref  |               |        |
| Yes                                          | 1.32 | (0.57 - 3.05)  | 0.512  | 1.56 | (1.21 - 2.03) | <0.001 |

Abbreviations: AOR= adjusted odds ratio; CI: confidence interval.

For each outcome, we constructed a weighted multivariable logistic regression model with SEs clustered at the prefecture-level. The above model was adjusted for sex, education, employment sector, COVID-19 infection rate and work from home.

## 256 Discussion

257 The incidence of physical and verbal abuse among the general population in Japan amid COVID-  
258 19 was found to be 3.8% and 7.6%, respectively. Both physical and verbal abuse was higher  
259 among female participants. Participants living in the areas where the “state of emergency” was  
260 imposed and those with low household income were more likely to experience physical abuse.  
261 Similarly, participants with poor health status and those having symptoms associated with  
262 COVID-19 were more likely to experience verbal abuse. Younger participants and participants  
263 with strained relationships were more likely to experience both physical and verbal abuse.  
264 Similarly, participants who had been abusing drugs, increasing their alcohol intake, not wearing  
265 a mask in public places were also more likely to experience both kinds of abuse.

266  
267 The incidence of physical and verbal abuse can be considered high taking into account the  
268 limited time of six months. However, due to the lack of data on the prevalence of abuse among  
269 similar populations over similar time periods, it is difficult to exactly quantify the changes in the  
270 incidence of the abuse. Nevertheless, previous studies have also highlighted the increased  
271 incidence of child abuse, elderly abuse, and gender-based violence during crises such as  
272 earthquakes, economic recession, etc. in Japan.<sup>39,40</sup>

273  
274 The percentage of women experiencing physical and verbal abuse was higher in our study.  
275 Previous studies have also underscored the higher incidence of abuse faced by female  
276 participants globally.<sup>41,42</sup> A longitudinal study conducted among 161 countries found that  
277 approximately one in three women have been subjected to different forms of intimate  
278 partner/non-partner or both abuse.<sup>43</sup> Women were found to experience higher rates of repeated  
279 abuse than males; and in most cases, males are found to be the perpetrator of the abuse.<sup>44</sup>

1  
2 280 Moreover, crises and times of unrest have been linked to an increased rate of abuse among  
3  
4 281 female participants.<sup>45</sup> However, from our study findings, we cannot claim women were more  
5  
6 282 likely to experience abuse than men as sex was not associated in the multivariable analysis. Our  
7  
8 283 study measured the incidence of abuse faced by people in the community (not only domestic  
9  
10 284 abuse), unlike other studies which are focused on domestic abuse and gender-based violence. In  
11  
12 285 addition, it has been found that both women and men are equally likely to initiate abuse and  
13  
14 286 violence although men tend to become more aggressive and opt for physical abuse.<sup>46</sup> Evidently,  
15  
16 287 in our study percentage of males experiencing verbal abuse was only slightly lower than female  
17  
18 288 participants with 44.5%. However, the incidence of physical abuse was distinctively higher  
19  
20 289 among females with 73.3%.

21  
22  
23  
24  
25 290  
26  
27 291 Globally, there was increasing concern about the heightened risk of abuse and violence during  
28  
29 292 the lockdown period. In line with that concern, our study found out that people residing in areas  
30  
31 293 where the “state of emergency” was enforced were more likely to experience physical abuse.  
32  
33 294 Moreover, as expected, participants who did not have a good relationship with their spouses were  
34  
35 295 more likely to experience abuse in our study. Restrictions and stay-at-home orders forced the  
36  
37 296 individual to spend time with their spouse and family members, which turned out to be a  
38  
39 297 catastrophic milieu for individuals whose relationships were already strained. Numerous studies  
40  
41 298 have highlighted the incidence of domestic violence amid COVID-19. For example, in China, the  
42  
43 299 incidence of domestic violence tripled compared to the previous year;<sup>47</sup> similarly, a 36% increase  
44  
45 300 in complaints of domestic abuse were reported in France;<sup>48</sup> in the UK, there was a 25% increase  
46  
47 301 in calls related to domestic violence.<sup>49</sup> Furthermore, many countries reported an increase in  
48  
49 302 homicide as a result of domestic violence.<sup>49</sup> It seems plausible that strained relationships are  
50  
51 303 more likely to cause conflict especially in times of crisis; however, when comparing participants  
52  
53  
54  
55  
56  
57  
58  
59  
60

1  
2 304 by marital status, our study findings highlighted that widows/widowers and divorcees were more  
3  
4 305 likely to experience verbal abuse compared to married ones. These findings align with the  
5  
6 306 previous study where the incidence of violence was higher among single women who were  
7  
8  
9 307 separated or widows compared to married ones.<sup>50</sup> The condition of widows/widowers and  
10  
11 308 divorcees, particularly women remains deplorable in society and often victimized because they  
12  
13 309 are considered weak with low social support.<sup>50</sup>  
14  
15

16 310  
17  
18 311 Moreover, economic repercussions due to COVID-19 were undeniable; the sudden and possibly  
19  
20 312 long-term increase in unemployment has precipitated or exacerbated potential stressors.<sup>9</sup> In our  
21  
22 313 study, participants who had low household incomes were more likely to experience abuse.  
23  
24 314 Findings align with the previous study where children born in families with low socioeconomic  
25  
26 315 status were 14 times more likely to experience maltreatment than those in higher quartiles.<sup>51</sup>  
27  
28 316 Furthermore, if a victim has adequate resources, they are more likely to escape from their  
29  
30 317 abusers. Particularly during COVID-19, instances of abuse were noted for not being able to pay  
31  
32 318 room rent and tuition fees,<sup>11</sup> which need to be addressed diligently.  
33  
34  
35  
36

37 319  
38  
39 320 Vulnerable participants such as those who had a poor health status, who were suffering from  
40  
41 321 COVID-19 related symptoms, and physically impaired (disabled) people were more likely to  
42  
43 322 experience verbal abuse in our study. Previous studies have also shown that disabled people are  
44  
45 323 more likely to experience different forms of abuse in their normal daily life.<sup>52</sup> During a stressful  
46  
47 324 pandemic, abuse could further exacerbate the situation of physically challenged individuals,  
48  
49 325 posing a threat to their mental and physical health. It is, therefore, crucial to pay special attention  
50  
51 326 to those individuals.  
52  
53  
54  
55  
56  
57  
58  
59  
60

1  
2 327 Apart from the socioeconomic factors, the practice of good personal behaviors is also equally  
3  
4 328 important to prevent violence and abuse in society. In our study, participants who were not using  
5  
6 329 masks regularly were more likely to experience verbal abuse. This was also evident from the  
7  
8  
9 330 information presented in various news portals where people were abused for not using masks in  
10  
11 331 public places.<sup>16,17,32</sup> Similarly, participants who had been abusing drugs and who were using  
12  
13 332 alcohol higher amounts than normal were more likely to experience verbal abuse. This finding  
14  
15 333 can be interpreted in different ways. Due to the cross-sectional nature of the study design,  
16  
17 334 findings might have been driven by reverse causality. For instance, people who are exposed to  
18  
19 335 abuse may later develop a habit of taking drugs and alcohol. Conversely, participants who  
20  
21 336 reported being abused might have actually perpetrated violence under the influence of the  
22  
23 337 substance due to a loss of self-control. Nonetheless, the finding of our study is not sufficient to  
24  
25 338 claim this notion.  
26  
27  
28  
29

30 339  
31  
32 340 The findings of our study should be interpreted in light of the following limitations. First, data  
33  
34 341 were collected from an internet survey which might have limited the responses of a certain group  
35  
36 342 of population. However, as described in the method section, this was adjusted to approximate the  
37  
38 343 national representative sample. Second, due to the cross-sectional design of our study, some  
39  
40 344 findings might have been driven by reverse causality. Lastly, since it was a self-reported survey,  
41  
42 345 there might have been under or over-reporting of the incidence. However, information about  
43  
44 346 confidentiality was explicitly mentioned to the participants. Despite these limitations, this is the  
45  
46 347 first nationwide cross-sectional study conducted to explore the incidence of abuse among the  
47  
48 348 general population amid COVID-19 during the restriction period. The findings of this study  
49  
50 349 could be highly valuable for designing effective interventions to mitigate this problem amid  
51  
52 350 crises.  
53  
54  
55  
56  
57  
58  
59  
60

## 351 **Conclusion**

352 The incidence of verbal abuse was comparatively higher than physical abuse among the general  
353 population in Japan amid COVID-19. Physical abuse was positively associated with the state of  
354 the emergency declaration during COVID-19. Furthermore, vulnerable people such as those with  
355 low household income, who had bad family relationships, widows, and divorcees were more  
356 likely to experience abuse. The findings of this study have reinforced important truths of existing  
357 inequalities among the general population which tend to be magnified during crises. Crises like  
358 COVID-19 do not inflict equivalent hardships to all people, rather exacerbate or spark diverse  
359 forms of abuse to vulnerable groups of the population. Moreover, restrictions that force abusive  
360 couples/family members to stay together would further contribute to violence and abuse in  
361 society. Therefore, it is highly imperative to look at the problem from a holistic approach to  
362 prevent the occurrence of other problems while trying to solve one.

## 363 **Author Contribution**

364 DB conceptualized, analyzed the data, wrote, and revised the manuscript. TT contributed to the  
365 conceptualization of this study, funding acquisition, project administration, review, and revision  
366 of the manuscript. AO, TS, YK, SS, SH, and MT contributed during the conceptualization,  
367 review, and revision of the manuscript. All authors read the final manuscript and approved it for  
368 submission.

## 369 **Funding**

370 This study was funded by the Japan Society for the Promotion of Science (JSPS) KAKENHI  
371 Grants [grant number 17H03589;19K10671;19K10446;18H03107; 18H03062], the JSPS Grant-  
372 in-Aid for Young Scientists [grant number 19K19439], Research support program to apply the  
373 wisdom of the university to tackle COVID-19 related emergency problems, University of

1  
2 374 Tsukuba, and Health Labor Sciences Research Grant [grant number 19FA1005;19FG2001]. The  
3  
4 375 findings and conclusions of this article are the sole responsibility of the authors and do not  
5  
6 376 represent the official views of the research funders.  
7  
8  
9

## 10 377 **Conflict of Interest**

11  
12 378 Dr. Akihiko Ozaki received personal fees from MNES Inc, outside the submitted work. All other  
13  
14 379 authors have declared that no competing interests exist.  
15  
16  
17

## 18 380 **Data availability statement**

19  
20  
21 381 The data that support the findings of this study are available on reasonable request. The data of  
22  
23 382 this study are not available in a public repository because they contain personally identifiable or  
24  
25 383 potentially sensitive participant information. Based on the regulations for ethical guidelines in  
26  
27 384 Japan, the Research Ethics Committee of the Osaka International Cancer Institute has imposed  
28  
29 385 restrictions on the dissemination of the data collected in this study. If any person wishes to verify  
30  
31 386 our data, they are most welcome to contact the corresponding author.  
32  
33  
34  
35

## 36 387 **References**

- 37  
38  
39 388 1. Futures without violence. The Facts on International Gender-based Violence [Internet].  
40  
41 389 2010 [cited 2021 Apr 30]. Available from:  
42  
43 390 <http://www.who.int/mediacentre/factsheets/fs239/en/>.<http://www.state.gov/documents/organization/143327.pdf>.  
44  
45  
46 391  
47  
48  
49 392 2. World Health Organization. World Health Organization. Violence against women  
50  
51 393 [Internet]. World Health Organization. 2021 [cited 2021 Apr 30]. Available from:  
52  
53 394 <https://www.who.int/news-room/fact-sheets/detail/violence-against-women>  
54  
55  
56 395 3. Smith SG, Fowler KA, Niolon PH. Intimate partner homicide and corollary victims in 16

- 1  
2 396 states: National violent death reporting system, 2003-2009. *Am J Public Health*. 2014  
3  
4 397 Mar;104(3):461–6.  
5  
6  
7 398 4. National Coalition Against Domestic Violence. Domestic violence. 2020 [cited 2021 Apr  
8  
9 399 30]; Available from: [https://assets.speakcdn.com/assets/2497/domestic\\_violence-](https://assets.speakcdn.com/assets/2497/domestic_violence-2020080709350855.pdf?1596811079991)  
10 400 2020080709350855.pdf?1596811079991.  
11  
12  
13  
14  
15 401 5. World Health Organization. Global and regional estimates of violence against women:  
16  
17 402 prevalence and health effects of intimate partner violence and non-partner sexual violence  
18  
19 403 [Internet]. 2013 [cited 2021 Apr 30]. Available from: [www.who.int](http://www.who.int)  
20  
21  
22 404 6. World Health Organization. Understanding and addressing violence against women  
23  
24 405 [Internet]. 2012 [cited 2021 Dec 11]. Available from:  
25  
26 406 [https://apps.who.int/iris/bitstream/handle/10665/77432/WHO\\_RHR\\_12.36\\_eng.pdf](https://apps.who.int/iris/bitstream/handle/10665/77432/WHO_RHR_12.36_eng.pdf)  
27  
28  
29  
30 407 7. Sharma A, Borah SB. Covid-19 and Domestic Violence: an Indirect Path to Social and  
31  
32 408 Economic Crisis. *J Fam Violence* [Internet]. 2020 Jul 28 [cited 2021 May 5];1–7.  
33  
34 409 Available from: <https://doi.org/10.1007/s10896-020-00188-8>  
35  
36  
37 410 8. Robillard R, Saad M, Edwards J, Solomonova E, Pennestri MH, Daros A, et al. Social,  
38  
39 411 financial and psychological stress during an emerging pandemic: Observations from a  
40  
41 412 population survey in the acute phase of COVID-19. *BMJ Open* [Internet]. 2020 Dec 12  
42  
43 413 [cited 2021 Apr 30];10(12):43805. Available from: <http://bmjopen.bmj.com/>  
44  
45  
46  
47 414 9. Yoshioka T, Okubo R, Tabuchi T, Odani S, Shinozaki T, Tsugawa Y. Factors associated  
48  
49 415 with serious psychological distress during the COVID-19 pandemic in Japan: a  
50  
51 416 nationwide cross-sectional internet-based study. *BMJ Open* [Internet]. 2021 Jul 1 [cited  
52  
53 417 2021 Dec 16];11(7):e051115. Available from:  
54  
55 418 <https://bmjopen.bmj.com/content/11/7/e051115>  
56  
57  
58  
59  
60



- 1  
2 419 10. Murayama H, Okubo R, Tabuchi T. Increase in Social Isolation during the COVID-19  
3  
4 420 Pandemic and Its Association with Mental Health: Findings from the JACSIS 2020 Study.  
5  
6 421 Int J Environ Res Public Heal 2021, Vol 18, Page 8238 [Internet]. 2021 Aug 4 [cited 2021  
7  
8 422 Dec 11];18(16):8238. Available from: <https://www.mdpi.com/1660-4601/18/16/8238/htm>
- 9  
10  
11  
12 423 11. Bhandari D, Kotera Y, Ozaki A, Abeysinghe S, Kosaka M, Tanimoto T. COVID-19:  
13  
14 424 challenges faced by Nepalese migrants living in Japan. BMC Public Health [Internet].  
15  
16 425 2021 Dec 19 [cited 2021 Apr 30];21(1):752. Available from:  
17  
18 426 <http://www.ncbi.nlm.nih.gov/pubmed/33874937>
- 19  
20  
21  
22 427 12. Ikeda T, Igarashi A, Odani S, Murakami M, Tabuchi T. Health-Related Quality of Life  
23  
24 428 during COVID-19 Pandemic: Assessing Impacts of Job Loss and Financial Support  
25  
26 429 Programs in Japan. Appl Res Qual Life [Internet]. 2021 Jan 30 [cited 2021 Dec 11];1–17.  
27  
28 430 Available from: <https://link.springer.com/article/10.1007/s11482-021-09918-6>
- 29  
30  
31  
32 431 13. Suga T. Response to Domestic Violence During the COVID-19 Outbreak in Japan.  
33  
34 432 Violence Gend [Internet]. 2021 Aug 25 [cited 2021 Dec 16];8(3):129–32. Available from:  
35  
36 433 <https://www.liebertpub.com/doi/abs/10.1089/vio.2020.0043>
- 37  
38  
39 434 14. UN Women. Violence against women and girls: the shadow pandemic | UN Women –  
40  
41 435 Headquarters [Internet]. 2020 [cited 2021 Apr 30]. Available from:  
42  
43 436 [https://www.unwomen.org/en/news/stories/2020/4/statement-ed-phumzile-violence-against-women-during-pandemic?gclid=Cj0KCQjw1a6EBhC0ARIsAOiTkrfnWaKUuGav8BOQ0Lz9\\_NAVMhVn1oL11bu9OIUOyGMrhDMw9Uuk2AYaAktDEALw\\_wcB](https://www.unwomen.org/en/news/stories/2020/4/statement-ed-phumzile-violence-against-women-during-pandemic?gclid=Cj0KCQjw1a6EBhC0ARIsAOiTkrfnWaKUuGav8BOQ0Lz9_NAVMhVn1oL11bu9OIUOyGMrhDMw9Uuk2AYaAktDEALw_wcB)
- 44  
45  
46 437  
47  
48 438  
49  
50 439  
51  
52  
53  
54 440 15. McKay D, Heisler M, Mishori R, Catton H, Kloiber O. Attacks against health-care  
55  
56 441 personnel must stop, especially as the world fights COVID-19 [Internet]. Vol. 395, The

- 1  
2 442 Lancet. Lancet Publishing Group; 2020 [cited 2021 Apr 30]. p. 1743–5. Available from:  
3  
4 443 <https://www.rivm.nl/en/novel->  
5  
6  
7 444 16. Opinion. Mask rage: ‘One man told me I shouldn’t be allowed out if I can’t wear one’ |  
8  
9 445 Coronavirus | The Guardian. 2020 [cited 2021 Apr 30]; Available from:  
10  
11 446 <https://www.theguardian.com/world/2020/aug/01/mask-face-coverings-i-cant-wear-one->  
12  
13 447 [health-reasons](https://www.theguardian.com/world/2020/aug/01/mask-face-coverings-i-cant-wear-one-health-reasons)  
14  
15  
16  
17 448 17. Avon and Somerset Police. Woman abused in Tesco for not wearing face mask - police  
18  
19 449 issue CCTV appeal | West Country | ITV News. 2021 [cited 2021 Apr 30]; Available  
20  
21 450 from: [https://www.itv.com/news/westcountry/2021-04-06/woman-abused-in-tesco-for-](https://www.itv.com/news/westcountry/2021-04-06/woman-abused-in-tesco-for-not-wearing-face-mask-police-issue-cctv-appeal)  
22  
23 451 [not-wearing-face-mask-police-issue-cctv-appeal](https://www.itv.com/news/westcountry/2021-04-06/woman-abused-in-tesco-for-not-wearing-face-mask-police-issue-cctv-appeal)  
24  
25  
26  
27 452 18. Ali SS. Some landlords are using harassment, threats to force out tenants during COVID-  
28  
29 453 19 crisis. 2020 Jun 14 [cited 2021 Apr 30]; Available from:  
30  
31 454 [https://www.nbcnews.com/news/us-news/some-landlords-are-using-harassment-threats-](https://www.nbcnews.com/news/us-news/some-landlords-are-using-harassment-threats-force-out-tenants-during-n1218216)  
32  
33 455 [force-out-tenants-during-n1218216](https://www.nbcnews.com/news/us-news/some-landlords-are-using-harassment-threats-force-out-tenants-during-n1218216)  
34  
35  
36  
37 456 19. Alejo K. Long-Term Physical and Mental Health Effects of Domestic Violence [Internet].  
38  
39 457 Vol. 2, Themis: Research Journal of Justice Studies and Forensic Science. 2014 [cited  
40  
41 458 2021 Apr 30]. Available from:  
42  
43 459 <http://scholarworks.sjsu.edu/themis>Availableat:<http://scholarworks.sjsu.edu/themis/vol2/is>  
44  
45 460 [s1/5](http://scholarworks.sjsu.edu/themis/vol2/is)  
46  
47  
48  
49 461 20. Kisely S, Strathearn L, Najman JM. Child maltreatment and mental health problems in 30-  
50  
51 462 year-old adults: A birth cohort study. *J Psychiatr Res*. 2020 Oct 1;129:111–7.  
52  
53  
54 463 21. Dhar D, McDougal L, Hay K, Atmavilas Y, Silverman J, Triplett D, et al. Associations  
55  
56 464 between intimate partner violence and reproductive and maternal health outcomes in  
57  
58  
59  
60

- 1  
2 465 Bihar, India: A cross-sectional study. *Reprod Health* [Internet]. 2018 Jun 19 [cited 2021  
3  
4 466 Apr 30];15(1):1–14. Available from: <https://link.springer.com/articles/10.1186/s12978->  
5  
6 467 018-0551-2  
7  
8  
9 468 22. Blasco-Ros C, Sánchez-Lorente S, Martínez M. Recovery from depressive symptoms,  
10 469 state anxiety and post-traumatic stress disorder in women exposed to physical and  
11  
12 470 psychological, but not to psychological intimate partner violence alone: A longitudinal  
13  
14 471 study. *BMC Psychiatry* [Internet]. 2010 Nov 25 [cited 2021 Apr 30];10(1):98. Available  
15  
16 472 from: <http://bmcp psychiatry.biomedcentral.com/articles/10.1186/1471-244X-10-98>  
17  
18  
19 473 23. Lee H, Kim Y, Terry J. Adverse childhood experiences (ACEs) on mental disorders in  
20  
21 474 young adulthood: Latent classes and community violence exposure. *Prev Med (Baltim)*.  
22  
23 475 2020 May 1;134:106039.  
24  
25  
26  
27  
28 476 24. Golding JM. Intimate partner violence as a risk factor for mental disorders: A meta-  
29  
30 477 analysis. *J Fam Violence* [Internet]. 1999 Jun [cited 2021 Apr 30];14(2):99–132.  
31  
32 478 Available from: <https://link.springer.com/article/10.1023/A:1022079418229>  
33  
34  
35  
36 479 25. Danielson KK, Moffitt TE, Caspi A, Silva PA. Comorbidity between abuse of an adult  
37  
38 480 and DSM-III-R mental disorders: Evidence from an epidemiological study. *Am J*  
39  
40 481 *Psychiatry* [Internet]. 1998 [cited 2021 Apr 30];155(1):131–3. Available from:  
41  
42 482 <https://pubmed.ncbi.nlm.nih.gov/9433353/>  
43  
44  
45  
46 483 26. Chen E, Turiano NA, Mroczek DK, Miller GE. Association of reports of childhood abuse  
47  
48 484 and all-cause mortality rates in women. *JAMA Psychiatry* [Internet]. 2016 Sep 1 [cited  
49  
50 485 2021 Apr 30];73(9):920–7. Available from: </pmc/articles/PMC5234580/>  
51  
52  
53  
54 486 27. Cripe SM, Sanchez SE, Gelaye B, Sanchez E, Williams MA. Association between  
55  
56 487 intimate partner violence, migraine and probable migraine. *Headache* [Internet]. 2011 Feb  
57  
58  
59  
60

- 1  
2 488 [cited 2021 Apr 30];51(2):208–19. Available from: /pmc/articles/PMC3662491/  
3  
4  
5 489 28. World Health Organization. Health consequences [Internet]. 2012 [cited 2021 Apr 30].  
6  
7 490 Available from:  
8  
9 491 [https://apps.who.int/iris/bitstream/handle/10665/77431/WHO\\_RHR\\_12.43\\_eng.pdf;jsessi](https://apps.who.int/iris/bitstream/handle/10665/77431/WHO_RHR_12.43_eng.pdf;jsessionid=6D01B3188171E7ED4A503DFBCCBF2E1D?sequence=1)  
10  
11 492 [onid=6D01B3188171E7ED4A503DFBCCBF2E1D?sequence=1](https://apps.who.int/iris/bitstream/handle/10665/77431/WHO_RHR_12.43_eng.pdf;jsessionid=6D01B3188171E7ED4A503DFBCCBF2E1D?sequence=1)  
12  
13  
14  
15 493 29. Honda S, Ogawa R. Domestic Violence in Japan. An Invisible Problem in the “Safest  
16  
17 494 Country in the World” [Internet]. 2021 [cited 2021 May 7]. Available from:  
18  
19 495 <https://www.associazionelucacoscioni.it/notizie/comunicati/violenza-domestica-cresce->  
20  
21 496 [durante-](https://www.associazionelucacoscioni.it/notizie/comunicati/violenza-domestica-cresce-)  
22  
23  
24  
25 497 30. Koga C, Hanazato M, Tsuji T, Suzuki N, Kondo K. Behavioural Science Section /  
26  
27 498 Original Paper Elder Abuse and Social Capital in Older Adults: The Japan Gerontological  
28  
29 499 Evaluation Study. *Gerontology* [Internet]. 2013 [cited 2021 May 7];66:149–59. Available  
30  
31 500 from: [www.karger.com/ger](http://www.karger.com/ger)  
32  
33  
34  
35 501 31. McGee O. Angry confrontation breaks out after man coughs on Yamanote Line train in  
36  
37 502 Tokyo - Japan Today. National [Internet]. 2020 Mar 2 [cited 2021 Apr 30]; Available  
38  
39 503 from: [https://japantoday.com/category/national/angry-confrontation-breaks-out-after-man-](https://japantoday.com/category/national/angry-confrontation-breaks-out-after-man-coughs-on-yamanote-line-train-in-tokyo)  
40  
41 504 [coughs-on-yamanote-line-train-in-tokyo](https://japantoday.com/category/national/angry-confrontation-breaks-out-after-man-coughs-on-yamanote-line-train-in-tokyo)  
42  
43  
44  
45 505 32. Japan Today. Man on train pushes emergency button after passenger without mask coughs  
46  
47 506 - Japan Today [Internet]. National. 2020 [cited 2021 Apr 30]. Available from:  
48  
49 507 [https://japantoday.com/category/national/Man-on-train-pushes-emergency-button-after-](https://japantoday.com/category/national/Man-on-train-pushes-emergency-button-after-passenger-without-mask-coughs)  
50  
51 508 [passenger-without-mask-coughs](https://japantoday.com/category/national/Man-on-train-pushes-emergency-button-after-passenger-without-mask-coughs)  
52  
53  
54  
55 509 33. Koga C, Hanazato M, Tsuji T, Suzuki N, Kondo K. Elder Abuse and Social Capital in  
56  
57 510 Older Adults: The Japan Gerontological Evaluation Study. *Gerontology*. 2020;66(2):149–

- 1  
2 511 59.  
3  
4  
5 512 34. Koga C, Tsuji T, Hanazato M, Suzuki N, Kondo K. Elder Abuse and Depressive  
6  
7 513 Symptoms: Which is Cause and Effect? Bidirectional Longitudinal Studies From the  
8  
9 514 JAGES. J Interpers Violence [Internet]. 2020 Dec 7 [cited 2021 Dec  
10  
11 515 16];886260520967135. Available from: <http://www.ncbi.nlm.nih.gov/pubmed/33280484>  
12  
13  
14  
15 516 35. Data Usage Guide | JACSIS study -Social and health inequalities assessment study due to  
16  
17 517 COVID-19 problem in Japan. [Internet]. [cited 2021 Dec 16]. Available from:  
18  
19 518 <https://takahiro-tabuchi.net/jacsis/howtouse/>  
20  
21  
22 519 36. Measures of crowding - WHO Housing and Health Guidelines - NCBI Bookshelf  
23  
24 520 [Internet]. [cited 2021 Dec 11]. Available from:  
25  
26 521 <https://www.ncbi.nlm.nih.gov/books/NBK535289/>  
27  
28  
29  
30 522 37. Struyf T, Deeks JJ, Dinnes J, Takwoingi Y, Davenport C, Leeftang MMG, et al. Signs and  
31  
32 523 symptoms to determine if a patient presenting in primary care or hospital outpatient  
33  
34 524 settings has COVID-19 disease [Internet]. Vol. 2020, Cochrane Database of Systematic  
35  
36 525 Reviews. John Wiley and Sons Ltd; 2020 [cited 2021 May 2]. Available from:  
37  
38 526 <https://pubmed.ncbi.nlm.nih.gov/32633856/>  
39  
40  
41  
42 527 38. Miyawaki A, Tabuchi T, Tomata Y, Tsugawa Y. Association between participation in the  
43  
44 528 government subsidy programme for domestic travel and symptoms indicative of COVID-  
45  
46 529 19 infection in Japan: cross-sectional study. BMJ Open [Internet]. 2021 Apr 1 [cited 2021  
47  
48 530 May 2];11(4):e049069. Available from: <http://dx.doi.org/10.1136/bmjopen-2021-049069>  
49  
50  
51  
52 531 39. Sakurai K, Nishigori H, Nishigori T, Mizuno S, Obara T, Iwama N, et al. Incidence of  
53  
54 532 Domestic Violence Against Pregnant Females After the Great East Japan Earthquake in  
55  
56 533 Miyagi Prefecture: The Japan Environment and Children's Study. Disaster Med Public  
57  
58  
59  
60

- 1  
2 534 Health Prep [Internet]. 2017 Apr 1 [cited 2021 Dec 12];11(2):216–26. Available from:  
3  
4 535 [https://www.cambridge.org/core/journals/disaster-medicine-and-public-health-](https://www.cambridge.org/core/journals/disaster-medicine-and-public-health-preparedness/article/abs/incidence-of-domestic-violence-against-pregnant-females-after-the-great-east-japan-earthquake-in-miyagi-prefecture-the-japan-environment-and-childrens-study/E92D4112933F12931015ACD9E8A89B41)  
5  
6 536 [preparedness/article/abs/incidence-of-domestic-violence-against-pregnant-females-after-](https://www.cambridge.org/core/journals/disaster-medicine-and-public-health-preparedness/article/abs/incidence-of-domestic-violence-against-pregnant-females-after-the-great-east-japan-earthquake-in-miyagi-prefecture-the-japan-environment-and-childrens-study/E92D4112933F12931015ACD9E8A89B41)  
7  
8 537 [the-great-east-japan-earthquake-in-miyagi-prefecture-the-japan-environment-and-](https://www.cambridge.org/core/journals/disaster-medicine-and-public-health-preparedness/article/abs/incidence-of-domestic-violence-against-pregnant-females-after-the-great-east-japan-earthquake-in-miyagi-prefecture-the-japan-environment-and-childrens-study/E92D4112933F12931015ACD9E8A89B41)  
9  
10 538 [childrens-study/E92D4112933F12931015ACD9E8A89B41](https://www.cambridge.org/core/journals/disaster-medicine-and-public-health-preparedness/article/abs/incidence-of-domestic-violence-against-pregnant-females-after-the-great-east-japan-earthquake-in-miyagi-prefecture-the-japan-environment-and-childrens-study/E92D4112933F12931015ACD9E8A89B41)  
11  
12  
13  
14 539 40. Yoshihama M, Yunomae T, Tsuge A, Ikeda K, Masai R. Violence Against Women and  
15  
16 540 Children Following the 2011 Great East Japan Disaster: Making the Invisible Visible  
17  
18 541 Through Research. Violence Against Women [Internet]. 2019 May 1 [cited 2021 Dec  
19  
20 542 12];25(7):862–81. Available from:  
21  
22 543 <https://journals.sagepub.com/doi/abs/10.1177/1077801218802642>  
23  
24  
25  
26 544 41. Yuan W, Hesketh T. Intimate partner violence against women and its association with  
27  
28 545 depression in three regions of China: a cross-sectional study. Lancet [Internet]. 2019 Oct 1  
29  
30 546 [cited 2021 May 10];394:S5. Available from: [www.thelancet.com](http://www.thelancet.com)  
31  
32  
33  
34 547 42. Samarasekera U, Horton R. Prevention of violence against women and girls: A new  
35  
36 548 chapter. Vol. 385, The Lancet. Lancet Publishing Group; 2015. p. 1480–2.  
37  
38  
39 549 43. World Health Organization. Global, regional and national prevalence estimates for  
40  
41 550 intimate partner violence against women and global and regional prevalence estimates for  
42  
43 551 non-partner sexual violence against women. [Internet]. 2018 [cited 2021 May 10].  
44  
45 552 Available from: [https://cdn.who.int/media/docs/default-source/documents/violence-](https://cdn.who.int/media/docs/default-source/documents/violence-prevention/vaw_report_web_09032021_oleksandr.pdf?sfvrsn=a82ef89c_5&download=true)  
46  
47 553 [prevention/vaw\\_report\\_web\\_09032021\\_oleksandr.pdf?sfvrsn=a82ef89c\\_5&download=tru](https://cdn.who.int/media/docs/default-source/documents/violence-prevention/vaw_report_web_09032021_oleksandr.pdf?sfvrsn=a82ef89c_5&download=true)  
48  
49 554 [e](https://cdn.who.int/media/docs/default-source/documents/violence-prevention/vaw_report_web_09032021_oleksandr.pdf?sfvrsn=a82ef89c_5&download=true)  
50  
51  
52  
53 555 44. Jewkes R, Fulu E, Roselli T, Garcia-Moreno C. Prevalence of and factors associated with  
54  
55 556 non-partner rape perpetration: Findings from the UN multi-country cross-sectional study  
56  
57  
58  
59  
60

- 1  
2 557 on men and violence in Asia and the Pacific. *Lancet Glob Heal* [Internet]. 2013 Oct 1  
3  
4 558 [cited 2021 May 10];1(4):e208–18. Available from: [www.thelancet.com/lancetgh](http://www.thelancet.com/lancetgh)  
5  
6  
7 559 45. Fraser E. Impact of COVID-19 Pandemic on Violence against Women and Girls  
8  
9 560 [Internet]. 2020 [cited 2021 May 10]. Available from:  
10  
11 561 <https://www.who.int/emergencies/diseases/novel-coronavirus->  
12  
13  
14  
15 562 46. Reid RJ, Bonomi AE, Rivara FP, Anderson ML, Fishman PA, Carrell DS, et al. Intimate  
16  
17 563 Partner Violence Among Men. Prevalence, Chronicity, and Health Effects. *Am J Prev*  
18  
19 564 *Med* [Internet]. 2008 Jun [cited 2021 May 10];34(6):478–85. Available from:  
20  
21 565 <https://pubmed.ncbi.nlm.nih.gov/18471583/>  
22  
23  
24  
25 566 47. Ebrahimian BA. China’s coronavirus quarantines raise domestic violence fears - Axios.  
26  
27 567 AXIOS [Internet]. 2020 [cited 2021 May 2]; Available from:  
28  
29 568 [https://www.axios.com/china-domestic-violencecoronavirus-quarantine-7b00c3ba-35bc-](https://www.axios.com/china-domestic-violencecoronavirus-quarantine-7b00c3ba-35bc-4d16-afdd-b76ecfb28882.html)  
30  
31 569 [4d16-afdd-b76ecfb28882.html](https://www.axios.com/china-domestic-violencecoronavirus-quarantine-7b00c3ba-35bc-4d16-afdd-b76ecfb28882.html)  
32  
33  
34  
35 570 48. Reuters News Agency. As domestic abuse rises in lockdown, France to fund hotel rooms |  
36  
37 571 Coronavirus pandemic News | Al Jazeera. 2020 Mar [cited 2021 May 2]; Available from:  
38  
39 572 [https://www.aljazeera.com/news/2020/3/31/as-domestic-abuse-rises-in-lockdown-france-](https://www.aljazeera.com/news/2020/3/31/as-domestic-abuse-rises-in-lockdown-france-to-fund-hotel-rooms)  
40  
41 573 [to-fund-hotel-rooms](https://www.aljazeera.com/news/2020/3/31/as-domestic-abuse-rises-in-lockdown-france-to-fund-hotel-rooms)  
42  
43  
44  
45 574 49. Bradbury-Jones C, Isham L. The pandemic paradox: The consequences of COVID-19 on  
46  
47 575 domestic violence. *J Clin Nurs* [Internet]. 2020 Jul 22 [cited 2021 May 2];29(13–  
48  
49 576 14):2047–9. Available from: <https://onlinelibrary.wiley.com/doi/abs/10.1111/jocn.15296>  
50  
51  
52 577 50. National Demographic and Health Survey PSA. One In Four Women Have Ever  
53  
54 578 Experienced Spousal Violence. [Internet]. Philippine Statistics Authority. 2017 [cited  
55  
56 579 2021 May 2]. Available from: <https://psa.gov.ph/content/one-four-women-have-ever->  
57  
58  
59

- 1  
2 580 experienced-spousal-violence-preliminary-results-2017-national  
3  
4  
5 581 51. O'Donnell M, Nassar N, Leonard H, Jacoby P, Mathews R, Patterson Y, et al.  
6  
7 582 Characteristics of non-Aboriginal and Aboriginal children and families with substantiated  
8  
9 583 child maltreatment: a population-based study. *Int J Epidemiol* [Internet]. 2010 Jun 1 [cited  
10  
11 584 2021 May 2];39(3):921–8. Available from: [https://academic.oup.com/ije/article-](https://academic.oup.com/ije/article-lookup/doi/10.1093/ije/dyq005)  
12  
13  
14 585 [lookup/doi/10.1093/ije/dyq005](https://academic.oup.com/ije/article-lookup/doi/10.1093/ije/dyq005)  
15  
16  
17 586 52. Fraser-Barbour EF, Crocker R, Walker R. Barriers and facilitators in supporting people  
18  
19 587 with intellectual disability to report sexual violence: perspectives of Australian disability  
20  
21  
22 588 and mainstream support providers. *J Adult Prot*. 2018;20(1):5–16.  
23  
24  
25 589  
26  
27  
28  
29  
30  
31  
32  
33  
34  
35  
36  
37  
38  
39  
40  
41  
42  
43  
44  
45  
46  
47  
48  
49  
50  
51  
52  
53  
54  
55  
56  
57  
58  
59  
60



**STROBE 2007 (v4) checklist of items to be included in reports of observational studies in epidemiology\***  
**Checklist for cohort, case-control, and cross-sectional studies (combined)**

| Section/Topic             | Item # | Recommendation                                                                                                                                                                                                                                                                                                                                                                                                                                                         | Reported on page #      |
|---------------------------|--------|------------------------------------------------------------------------------------------------------------------------------------------------------------------------------------------------------------------------------------------------------------------------------------------------------------------------------------------------------------------------------------------------------------------------------------------------------------------------|-------------------------|
| Title and abstract        | 1      | (a) Indicate the study's design with a commonly used term in the title or the abstract                                                                                                                                                                                                                                                                                                                                                                                 | Page 2 [Line 31]        |
|                           |        | (b) Provide in the abstract an informative and balanced summary of what was done and what was found                                                                                                                                                                                                                                                                                                                                                                    | Page 2 [Line 24-49]     |
| <b>Introduction</b>       |        |                                                                                                                                                                                                                                                                                                                                                                                                                                                                        |                         |
| Background/rationale      | 2      | Explain the scientific background and rationale for the investigation being reported                                                                                                                                                                                                                                                                                                                                                                                   | Page 4-6 [Line 63-109]  |
| Objectives                | 3      | State specific objectives, including any pre-specified hypotheses                                                                                                                                                                                                                                                                                                                                                                                                      | Page 5-6 [Line 106-109] |
| <b>Methods</b>            |        |                                                                                                                                                                                                                                                                                                                                                                                                                                                                        |                         |
| Study design              | 4      | Present key elements of study design early in the paper                                                                                                                                                                                                                                                                                                                                                                                                                | Page 6 [Line 113-123]   |
| Setting                   | 5      | Describe the setting, locations, and relevant dates, including periods of recruitment, exposure, follow-up, and data collection                                                                                                                                                                                                                                                                                                                                        | Page 6 [Line 116-118]   |
| Participants              | 6      | (a) <i>Cohort study</i> —Give the eligibility criteria, and the sources and methods of selection of participants. Describe methods of follow-up<br><i>Case-control study</i> —Give the eligibility criteria, and the sources and methods of case ascertainment and control selection. Give the rationale for the choice of cases and controls<br><i>Cross-sectional study</i> —Give the eligibility criteria, and the sources and methods of selection of participants | Page 6 [Line 115]       |
|                           |        | (b) <i>Cohort study</i> —For matched studies, give matching criteria and number of exposed and unexposed<br><i>Case-control study</i> —For matched studies, give matching criteria and the number of controls per case                                                                                                                                                                                                                                                 | Not applicable          |
| Variables                 | 7      | Clearly define all outcomes, exposures, predictors, potential confounders, and effect modifiers. Give diagnostic criteria, if applicable                                                                                                                                                                                                                                                                                                                               | Page 6-8 [Line 125-165] |
| Data sources/ measurement | 8*     | For each variable of interest, give sources of data and details of methods of assessment (measurement). Describe comparability of assessment methods if there is more than one group                                                                                                                                                                                                                                                                                   | Page 6-8 [Line 125-165] |
| Bias                      | 9      | Describe any efforts to address potential sources of bias                                                                                                                                                                                                                                                                                                                                                                                                              | Page 8 [Line 173-177]   |
| Study size                | 10     | Explain how the study size was arrived at                                                                                                                                                                                                                                                                                                                                                                                                                              | Page 6 [Line 113-118]   |
| Quantitative variables    | 11     | Explain how quantitative variables were handled in the analyses. If applicable, describe which groupings were chosen and why                                                                                                                                                                                                                                                                                                                                           | Page 8-9 [Line 167-189] |
| Statistical methods       | 12     | (a) Describe all statistical methods, including those used to control for confounding                                                                                                                                                                                                                                                                                                                                                                                  | Page 9 [Line 182-184]   |
|                           |        | (b) Describe any methods used to examine subgroups and interactions                                                                                                                                                                                                                                                                                                                                                                                                    | Not applicable          |

|                          |     |                                                                                                                                                                                                                                                                                                           |                          |
|--------------------------|-----|-----------------------------------------------------------------------------------------------------------------------------------------------------------------------------------------------------------------------------------------------------------------------------------------------------------|--------------------------|
|                          |     | (c) Explain how missing data were addressed                                                                                                                                                                                                                                                               | Page 8 [Line 167-171]    |
|                          |     | (d) <i>Cohort study</i> —If applicable, explain how loss to follow-up was addressed<br><i>Case-control study</i> —If applicable, explain how matching of cases and controls was addressed<br><i>Cross-sectional study</i> —If applicable, describe analytical methods taking account of sampling strategy | Not applicable           |
|                          |     | (e) Describe any sensitivity analyses                                                                                                                                                                                                                                                                     | Not applicable           |
| <b>Results</b>           |     |                                                                                                                                                                                                                                                                                                           |                          |
| Participants             | 13* | (a) Report numbers of individuals at each stage of study—eg numbers potentially eligible, examined for eligibility, confirmed eligible, included in the study, completing follow-up, and analysed                                                                                                         | Page 6 [Line 114-118]    |
|                          |     | (b) Give reasons for non-participation at each stage                                                                                                                                                                                                                                                      | NA                       |
|                          |     | (c) Consider use of a flow diagram                                                                                                                                                                                                                                                                        | NA                       |
| Descriptive data         | 14* | (a) Give characteristics of study participants (eg demographic, clinical, social) and information on exposures and potential confounders                                                                                                                                                                  | Page 9,10 [Line 191-205] |
|                          |     | (b) Indicate number of participants with missing data for each variable of interest                                                                                                                                                                                                                       | NA                       |
|                          |     | (c) <i>Cohort study</i> —Summarise follow-up time (eg, average and total amount)                                                                                                                                                                                                                          | NA                       |
| Outcome data             | 15* | <i>Cohort study</i> —Report numbers of outcome events or summary measures over time                                                                                                                                                                                                                       | NA                       |
|                          |     | <i>Case-control study</i> —Report numbers in each exposure category, or summary measures of exposure                                                                                                                                                                                                      | NA                       |
|                          |     | <i>Cross-sectional study</i> —Report numbers of outcome events or summary measures                                                                                                                                                                                                                        | Page 9,10,11             |
| Main results             | 16  | (a) Give unadjusted estimates and, if applicable, confounder-adjusted estimates and their precision (eg, 95% confidence interval). Make clear which confounders were adjusted for and why they were included                                                                                              | Page 9-11 [Line 119-224] |
|                          |     | (b) Report category boundaries when continuous variables were categorized                                                                                                                                                                                                                                 | Page 7 [Line 133-141]    |
|                          |     | (c) If relevant, consider translating estimates of relative risk into absolute risk for a meaningful time period                                                                                                                                                                                          | NA                       |
| Other analyses           | 17  | Report other analyses done—eg analyses of subgroups and interactions, and sensitivity analyses                                                                                                                                                                                                            | NA                       |
| <b>Discussion</b>        |     |                                                                                                                                                                                                                                                                                                           |                          |
| Key results              | 18  | Summarise key results with reference to study objectives                                                                                                                                                                                                                                                  | Page 12 [Line 229-237]   |
| Limitations              | 19  | Discuss limitations of the study, taking into account sources of potential bias or imprecision. Discuss both direction and magnitude of any potential bias                                                                                                                                                | Page 16 [Line 322-327]   |
| Interpretation           | 20  | Give a cautious overall interpretation of results considering objectives, limitations, multiplicity of analyses, results from similar studies, and other relevant evidence                                                                                                                                | Page 16 [Line 333-344]   |
| Generalisability         | 21  | Discuss the generalisability (external validity) of the study results                                                                                                                                                                                                                                     | Page 16 [Line 328-331]   |
| <b>Other information</b> |     |                                                                                                                                                                                                                                                                                                           |                          |

1  
2  
3  
4  
5  
6  
7  
8  
9  
10  
11  
12  
13  
14  
15  
16  
17  
18  
19  
20  
21  
22  
23  
24  
25  
26  
27  
28  
29  
30  
31  
32  
33  
34  
35  
36  
37  
38  
39  
40  
41  
42  
43  
44  
45  
46

|         |    |                                                                                                                                                               |                        |
|---------|----|---------------------------------------------------------------------------------------------------------------------------------------------------------------|------------------------|
| Funding | 22 | Give the source of funding and the role of the funders for the present study and, if applicable, for the original study on which the present article is based | Page 17 [Line 350-356] |
|---------|----|---------------------------------------------------------------------------------------------------------------------------------------------------------------|------------------------|

\*Give information separately for cases and controls in case-control studies and, if applicable, for exposed and unexposed groups in cohort and cross-sectional studies.

**Note:** An Explanation and Elaboration article discusses each checklist item and gives methodological background and published examples of transparent reporting. The STROBE checklist is best used in conjunction with this article (freely available on the Web sites of PLoS Medicine at <http://www.plosmedicine.org/>, Annals of Internal Medicine at <http://www.annals.org/>, and Epidemiology at <http://www.epidem.com/>). Information on the STROBE Initiative is available at [www.strobe-statement.org](http://www.strobe-statement.org).

For peer review only
